# Supplementary material for: The test-retest reliability of a Body Posture Literacy Questionnaire among Polish teachers from different educational levels
Source: PeerJ journal article supplement (doi:10.7717/peerj.17952), 2024-09-23
Supplement: Codebook.docx [file Codebook.docx]

**English-language codebook to the supplementary_material_1_(1)_.xlsx file**

Q= Question

Q1.1= question 1 part 1

Pre= Pre-test

Post= Post-test

Q1.2= question 1 part 2

Q1.3= question 1 part 3
