# Supplementary material for: The test-retest reliability of a Body Posture Literacy Questionnaire among Polish teachers from different educational levels
Source: PeerJ journal article supplement (doi:10.7717/peerj.17952), 2024-09-23
Supplement: Rawdata.xlsx [file Rawdata.xlsx]

## Sheet: Sheet1
Timestamp	Recognition of irregularities	The name of the abnormality in the body posture that you marked in the previous photo	Probable causes of irregularities	Recognition of irregularities	The name of the abnormality in the body posture that you marked in the previous photo	Probable causes of irregularities	Recognition of irregularities	The name of the abnormality in the body posture that you marked in the previous photo	Probable causes of irregularities	Recognition of irregularities	The name of the abnormality in the body posture that you marked in the previous photo	Probable causes of irregularities	Recognition of irregularities	The name of the abnormality in the body posture that you marked in the previous photo	Probable causes of irregularities	Recognition of irregularities	The name of the abnormality in the body posture that you marked in the previous photo	Probable causes of irregularities	Recognition of irregularities	The name of the abnormality in the body posture that you marked in the previous photo	Probable causes of irregularities	Recognition of irregularities	The name of the abnormality in the body posture that you marked in the previous photo	Probable causes of irregularities	Which of the following sitting positions, in your opinion, is correct?	Why is the sitting position you choose to be correct?	Which of the following lifting and moving positions, in your opinion, is correct?	Why is the lifting and moving position you have chosen correct?	When working with a computer, which of the following sitting positions, in your opinion, is correct?	Why is the sitting position you choose while working at the computer correct?	Which of the following positions taken while walking, in your opinion, is correct?	Why is the position you choose when walking correct?	When using a smartphone, which of the following items, in your opinion, is correct?	Why is the position you have chosen when using your smartphone correct?	When writing, which of the following items, in your opinion, is correct?	Why is the position you choose while writing correct?	Which way of wearing a school backpack, in your opinion, is correct?	Why is the way you choose to wear a school backpack correct?	Which of the following lying positions, in your opinion, is correct?	Why is the lying position you choose correct?	1. What age group are you in?	2. Which answer best defines your gender?	3. What is your profession?	4. What is your marital status?	5. Which of the listed positions best describes your level of education?	6. What is your employment status?	7. Where do you live?	8. How many children do you raise in your family?	9. How would you describe the financial situation of your family?
2023-05-27 17:27:09	B	Excessive extension of the head and shoulders forward	3. Using the Internet, playing games on mobile devices with the head set in the wrong position	C	Incorrect size of thoracic kyphosis	1. Incorrect body posture or rounding of the back while working at the computer	A	Incorrect size of lumbar lordosis	1. Abdominal muscle weakness	C	Scoliosis	2. Long work at the computer in an asymmetrical sitting position	B	Knee stying	3. Excessive supination of the foot/feet	A	Knee valgus	1. This abnormality is common in young children, mild cases are not a cause for concern	C	Flat foot	3. Stretching (and weakening) of the plantar tendon and internal muscles of the foot	B	Toe valgus	2. Walking in shoes that are too small and too narrow	C	1. This position is correct because the entire spine is in the correct position	A	3. This position is correct because the person uses the knee joints and thigh muscles to prevent spinal overload	B	1. This position is correct because the spine is correctly positioned with properly preserved curvatures	C	1. This position is correct because the person walks straight, keeping his head in the correct position	B	2. This position is correct because the entire spine is erect and in the right position	C	1. This position is correct because the spine is in the right position	A	1. Such carrying a backpack is correct because it adheres to the back, 2. Such carrying a backpack is correct, because its straps are properly adjusted, 3. The weight of the backpack should not exceed 15% of the child's body weight	C	2. This position is correct because the position of the entire spine is properly positioned	4. Over 45 years old	2. Woman	Physiotherapist	2. Married	4. Higher education	2. Employed	4. A city with a population of 50 to 200,000	2. Two	4. Good - the budget covers the expenses related to the maintenance of the family; enough to pay for additional activities for the child and summer and winter holidays for the family
2023-05-31 13:44:29	B	Excessive extension of the head and shoulders forward	Watching TV in the wrong position, Using the Internet, playing games on mobile devices with the head set in the wrong position, Too long use of the mobile phone in the wrong position	C	Incorrect size of thoracic kyphosis	Incorrect body posture or rounding of the back while working at the computer, Too long use of the mobile phone in the wrong position	A	Incorrect size of lumbar lordosis	Abdominal muscle weakness	C	Scoliosis	Long work at the computer in an asymmetrical sitting position	B	Knee stying	Osteoarthritis of the knee joint	A	Knee valgus	This abnormality is common in young children, mild cases are not a cause for concern	C	Flat foot	Stretching (and weakening) of the plantar tendon and internal muscles of the foot	B	Toe valgus	Walking in shoes that are too small and too narrow	C	This position is correct, because_x0002_the knee joints are not in the non_x0002_toural setting	A	This position is correct because the lumbar spine (back) is straight and its position prevents so-called low back pain, This position is correct because the person uses the knee joints and thigh muscles to prevent spinal overload	B	This position is correct because the spine is correctly positioned, with properly preserved curves	C	This position is correct because the person walks straight, keeping his head in the correct position	B	This position is correct because the head and neck are in the correct position and the person is not looking down, This position is correct because the entire spine is straight and in the right position	C	This position is correct because the spine is in the right position	A	Such carrying a backpack is beneficial because it is put on both arms, Such carrying a backpack is beneficial - the straps of the backpack are properly adjusted, the backpack fits well to the back	B	This position is correct because the position of the entire spine is properly positioned	4. Over 45 years old	2. Woman	Schoolteacher	2. Married	4. Higher education	2. Employed	5. City with more than 200,000 inhabitants	3. Three	4. Good - the budget covers the expenses related to the maintenance of the family; enough to pay for additional activities for the child and summer and winter holidays for the family
2023-05-31 14:00:47	B	Excessive extension of the head and shoulders forward	Watching TV in the wrong position, Using the Internet, playing games on mobile devices with the head set in the wrong position, Too long use of the mobile phone in the wrong position	C	I don't know	Incorrect body posture or rounding of the back while working at the computer, Too long time of standing, Too long use of the mobile phone in the wrong position	A	I don't know	Abdominal muscle weakness	C	Incorrect size of thoracic kyphosis	Long work at the computer in an asymmetrical sitting position	B	I don't know	I don't know	A	I don't know	If this defect occurs in children under 10 years of age, consult a specialist as soon as possible	C	Flat foot	Over time, this problem contributes to the deformation of the ankle joint and causes pain	B	Toe valgus	Walking in shoes that are too small and too narrow	B	This position is correct, because_x0002_the knee joints are not in the non_x0002_toural setting	A	This position is correct because the lumbar spine (back) is straight and its position prevents so-called low back pain	B	This position is correct because the spine is correctly positioned, with properly preserved curves	C	This position is correct because the person walks straight, keeping his head in the correct position	B	This position is correct because the head and neck are in the correct position and the person is not looking down	C	This position is correct because the spine is in the right position	A	It is beneficial to carry a backpack like this because it is worn on both shoulders	C	This position is correct because the head and cervical spine are positioned correctly, This position is correct because the position of the entire spine is properly positioned, This position is correct and does not cause disturbances in body posture	3. 36 - 45 years	2. Woman	WR Secretariat	2. Married	4. Higher education	2. Employed	5. City with more than 200,000 inhabitants	3. Three	3. Average - the budget is enough for basic expenses related to the maintenance of the family, as well as to pay for additional activities for the child
2023-05-31 16:07:03	B	Excessive extension of the head and shoulders forward	I don't know	C	Incorrect size of thoracic kyphosis	Incorrect body posture or rounding of the back while working at the computer	A	Incorrect size of lumbar lordosis	Abdominal muscle weakness	C	Scoliosis	Long computer work in an asymmetrical sitting position, the habit of incorrect body posture in a sitting position during the day	B	Knee valgus	Osteoarthritis of the knee joint, Excessive supination of the foot/foot	A	Knee valgus	If this defect occurs in children under 10 years of age, consult a specialist as soon as possible	C	Flat foot	Over time, this problem contributes to the deformation of the ankle joint and causes pain, stretching (and weakness) of the plantar tendon and internal muscles of the foot	B	Toe valgus	Walking in high-heeled shoes, Walking in shoes that are too small and too narrow	C	This position is correct, because_x0002_the knee joints are not in the non_x0002_toural setting	B	This position is correct because the person uses the knee joints and thigh muscles to prevent spinal overload	B	This position is correct because the spine is correctly positioned, with properly preserved curves	C	This position is correct because the person walks straight, keeping his head in the correct position	B	This position is correct because the head and neck are in the correct position and the person is not looking down	C	This position is correct because the spine is in the right position	A	Such carrying a backpack is beneficial because it is put on both arms, Such carrying a backpack is beneficial - the straps of the backpack are properly adjusted, the backpack fits well to the back	C	This position is correct and does not cause posture disorders	4. Over 45 years old	2. Woman	Schoolteacher	2. Married	4. Higher education	2. Employed	1. The village	2. Two	4. Good - the budget covers the expenses related to the maintenance of the family; enough to pay for additional activities for the child and summer and winter holidays for the family
2023-05-31 20:25:04	B	Excessive extension of the head and shoulders forward	Watching TV in the wrong position, Using the Internet, playing games on mobile devices with the head set in the wrong position, Too long use of the mobile phone in the wrong position	C	Incorrect size of thoracic kyphosis	Incorrect body posture or rounding of the back while working at the computer, Habitual performance of daily activities with the dominant hand, Too long use of the mobile phone in the wrong position	A	Shoulders forward	Abdominal muscle weakening, performing physical exercises with load and strengthening abdominal muscles	C	I don't know	Performing activities symmetrically, evenly loading both sides of the body	B	Knee valgus	Osteoarthritis of the knee joint	A	Knee valgus	This abnormality is common in young children, mild cases are not a cause for concern, If this defect occurs in children under 10 years of age, consult a specialist as soon as possible	C	Flat foot	Stretching (and weakening) of the plantar tendon and internal muscles of the foot	B	Hollow foot	I don't know	C	This position is correct, ponie_x0002_waż knee joints are not in non_x0002_tural position, This position is correct because it reduces body weight	A	This position is correct because the person uses the knee joints and thigh muscles to prevent spinal overload	B	This position is correct because the computer screen is above eye level	B	This position is correct because the person walks straight, keeping his head in the correct position	B	This position is correct because the entire spine is erect and in the right position	C	This position is correct because the spine is in the right position	A	It is beneficial to carry a backpack like this because it is worn on both shoulders	A	I don't know	2. 26 - 30 years	2. Woman	Vocational school	2. Married	2. Vocational school	1. Unemployed	1. The village	2. Two	5. Very good - income allows you to spend money freely, does not limit expenses
2023-05-31 21:45:22	B	Excessive extension of the head and shoulders forward	Using the Internet, playing games on mobile devices with the head set in the wrong position, Too long use of the mobile phone in the wrong position	C	Incorrect size of lumbar lordosis	Incorrect body posture or rounding of the back while working at the computer	A	Incorrect size of thoracic kyphosis	Walking in high-heeled shoes for a long time	C	Scoliosis	Long computer work in an asymmetrical sitting position, the habit of incorrect body posture in a sitting position during the day	B	Knee valgus	Excessive supination of the foot/feet	A	Knee stying	This abnormality is common in young children, mild cases are not a cause for concern	C	Flat foot	Stretching (and weakening) of the plantar tendon and internal muscles of the foot	B	Toe valgus	Walking in high-heeled shoes, Walking in shoes that are too small and too narrow	C	This position is correct, because_x0002_the knee joints are not in the non_x0002_toural setting	A	This position is correct because the lumbar spine (back) is straight and its position prevents so-called low back pain, This position is correct because the person uses the knee joints and thigh muscles to prevent spinal overload	B	This position is correct because the spine is correctly positioned, with properly preserved curves	C	This position is correct because the person walks straight, keeping his head in the correct position	B	This position is correct because the head and neck are in the correct position and the person is not looking down, This position is correct because the entire spine is straight and in the right position	C	This position is correct because the spine is in the right position	A	Such carrying a backpack is beneficial because it is put on both arms, Such carrying a backpack is beneficial - the straps of the backpack are properly adjusted, the backpack fits well to the back	C	This position is correct because the head and cervical spine are positioned correctly, This position is correct because the position of the entire spine is properly positioned, This position is correct and does not cause disturbances in body posture	3. 36 - 45 years	1. Man	Wizard	2. Married	4. Higher education	2. Employed	5. City with more than 200,000 inhabitants	2. Two	4. Good - the budget covers the expenses related to the maintenance of the family; enough to pay for additional activities for the child and summer and winter holidays for the family
2023-05-31 22:09:56	B	Scoliosis	Watching TV in the wrong position, Using the Internet, playing games on mobile devices with the head set in the wrong position	C	Incorrect size of lumbar lordosis	Incorrect body posture or rounding of the back while working at the computer, Too long time in a standing position	A	Incorrect size of lumbar lordosis	Abdominal muscle weakness	C	Incorrect size of lumbar lordosis	Long computer work in an asymmetrical sitting position, the habit of incorrect body posture in a sitting position during the day	B	Knee valgus	Osteoarthritis of the knee joint	A	Knee valgus	If this defect occurs in children under 10 years of age, consult a specialist as soon as possible	C	Flat foot	I don't know	B	Toe valgus	Walking in high-heeled shoes	C	This position is correct, because_x0002_the knee joints are not in the non_x0002_toural setting	A	This position is correct because the lumbar spine (back) is straight and its position prevents so-called low back pain	B	This position is correct because the spine is correctly positioned, with properly preserved curves	C	This position is correct because the person walks straight, keeping his head in the correct position	B	This position is correct because the head and neck are in the correct position and the person is not looking down	C	This position is correct because the spine is in the right position	A	Such carrying a backpack is beneficial because it is put on both arms, Such carrying a backpack is beneficial - the straps of the backpack are properly adjusted, the backpack fits well to the back	C	This position is correct because the head and cervical spine are positioned correctly, This position is correct because the position of the entire spine is properly positioned, This position is correct and does not cause disturbances in body posture	3. 36 - 45 years	2. Woman	Seller	2. Married	2. Vocational school	5. Other	1. The village	2. Two	2. Ebad - the budget meets only the basic expenses related to the maintenance of the family
2023-05-31 22:21:51	B	Excessive extension of the head and shoulders forward	Watching TV in the wrong position, Using the Internet, playing games on mobile devices with the head set in the wrong position, Too long use of the mobile phone in the wrong position	C	Incorrect size of thoracic kyphosis	Incorrect body posture or rounding of the back while working at the computer	A	Incorrect size of lumbar lordosis	Abdominal muscle weakness	C	Scoliosis	Long computer work in an asymmetrical sitting position, the habit of incorrect body posture in a sitting position during the day	B	Knee valgus	I don't know	A	Knee valgus	If this defect occurs in children under 10 years of age, consult a specialist as soon as possible	C	Flat foot	Over time, this problem contributes to the deformation of the ankle joint and causes pain	B	Toe valgus	Walking in shoes that are too small and too narrow	C	This position is correct, because_x0002_the knee joints are not in the non_x0002_toural setting	A	This position is correct because the lumbar spine (back) is straight and its position prevents so-called low back pain, This position is correct because the person uses the knee joints and thigh muscles to prevent spinal overload	B	This position is correct because the spine is correctly positioned, with properly preserved curves	C	This position is correct because the person walks straight, keeping his head in the correct position	B	This position is correct because the head and neck are in the correct position and the person is not looking down, This position is correct because the entire spine is straight and in the right position	C	This position is correct because the spine is in the right position	A	Such carrying a backpack is beneficial because it is put on both arms, Such carrying a backpack is beneficial - the straps of the backpack are properly adjusted, the backpack fits well to the back	C	This position is correct because the head and cervical spine are positioned correctly, This position is correct because the position of the entire spine is properly positioned, This position is correct and does not cause disturbances in body posture	3. 36 - 45 years	2. Woman	Biotechnologist	2. Married	4. Higher education	2. Employed	5. City with more than 200,000 inhabitants	2. Two	4. Good - the budget covers the expenses related to the maintenance of the family; enough to pay for additional activities for the child and summer and winter holidays for the family
2023-05-31 22:51:00	B	Excessive extension of the head and shoulders forward	Watching TV in the wrong position, Using the Internet, playing games on mobile devices with the head set in the wrong position, Too long use of the mobile phone in the wrong position	C	Incorrect size of lumbar lordosis	I don't know	A	Incorrect size of lumbar lordosis	Abdominal muscle weakness	C	Scoliosis	Long computer work in an asymmetrical sitting position, the habit of incorrect body posture in a sitting position during the day	B	Knee stying	I don't know	A	Knee valgus	This abnormality is common in young children, mild cases are not a cause for concern, If this defect occurs in children under 10 years of age, consult a specialist as soon as possible	C	Flat foot	Over time, this problem contributes to the deformation of the ankle joint and causes pain, stretching (and weakness) of the plantar tendon and internal muscles of the foot	B	Toe valgus	Walking in high-heeled shoes, Walking in shoes that are too small and too narrow	C	This position is correct, because_x0002_the knee joints are not in the non_x0002_toural setting	A	This position is correct because the lumbar spine (back) is straight and its position prevents so-called low back pain	B	This position is correct because the spine is correctly positioned, with properly preserved curves	C	This position is correct because the person walks straight, keeping his head in the correct position	B	This position is correct because the head and neck are in the correct position and the person is not looking down	C	This position is correct because the spine is in the right position	A	It is beneficial to carry a backpack like this because it is worn on both shoulders	C	This position is correct because the head and cervical spine are correctly positioned	4. Over 45 years old	2. Woman	Academic teacher	2. Married	4. Higher education	2. Employed	5. City with more than 200,000 inhabitants	3. Three	4. Good - the budget covers the expenses related to the maintenance of the family; enough to pay for additional activities for the child and summer and winter holidays for the family
2023-06-01 09:17:13	B	Excessive extension of the head and shoulders forward	Too long use of the mobile phone in the wrong position	C	I don't know	Incorrect body posture or rounding of the back while working at the computer	B	I don't know	I don't know	A	I don't know	The habit of incorrect body posture in a sitting position during the day	C	Bent contracture in the knee joints	Osteoarthritis of the knee joint	C	Overright in the knee joints	If this defect occurs in children under 10 years of age, consult a specialist as soon as possible	B	Flat foot	I don't know	A	I don't know	I don't know	A	I don't know	A	This position is correct because the spine is bent to reduce the weight of the object	B	This position is correct because the cervical spine is bent	C	This position is correct because the person walks straight, keeping his head in the correct position	B	This position is correct because the entire spine is erect and in the right position	C	This position is correct because the spine is in the right position	A	Such carrying a backpack is beneficial because it is put on both arms, Such carrying a backpack is beneficial - the straps of the backpack are properly adjusted, the backpack fits well to the back	C	This position is correct because the head and cervical spine are positioned correctly, This position is correct and does not cause disturbances in body posture	3. 36 - 45 years	2. Woman	Administrative employee	2. Married	4. Higher education	2. Employed	4. A city with a population of 50 to 200,000	1. One thing	4. Good - the budget covers the expenses related to the maintenance of the family; enough to pay for additional activities for the child and summer and winter holidays for the family
2023-06-01 10:25:28	B	Excessive extension of the head and shoulders forward	Watching TV in the wrong position, Using the Internet, playing games on mobile devices with the head set in the wrong position, Too long use of the mobile phone in the wrong position	C	Scoliosis	Incorrect body posture or rounding of the back while working at the computer, Too long use of the mobile phone in the wrong position	A	Incorrect size of lumbar lordosis	Abdominal muscle weakness	C	Scoliosis	Long work at the computer in an asymmetric sitting position, The habit of incorrect body posture in a sitting position during the day, Working in a standing position	B	Knee valgus	Osteoarthritis of the knee joint	A	Knee stying	This abnormality is common in young children, mild cases are not a cause for concern, If this defect occurs in children under 10 years of age, consult a specialist as soon as possible	C	Flat foot	Over time, this problem contributes to the deformation of the ankle joint and causes pain, running	B	Toe valgus	Walking in high-heeled shoes, Walking in shoes that are too small and too narrow	C	This position is correct, because_x0002_the knee joints are not in the non_x0002_toural setting	A	This position is correct because the lumbar spine (back) is straight and its position prevents so-called low back pain, This position is correct because the person uses the knee joints and thigh muscles to prevent spinal overload	B	This position is correct because the spine is correctly positioned, with properly preserved curves	C	This position is correct because the person walks straight, keeping his head in the correct position	B	This position is correct because the head and neck are in the correct position and the person is not looking down, This position is correct because the entire spine is straight and in the right position	C	This position is correct because the spine is in the right position	A	Such carrying a backpack is beneficial because it is put on both arms, Such carrying a backpack is beneficial - the straps of the backpack are properly adjusted, the backpack fits well to the back	C	This position is correct because the head and cervical spine are positioned correctly, This position is correct because the position of the entire spine is properly positioned, This position is correct and does not cause disturbances in body posture	3. 36 - 45 years	2. Woman	Academic teacher	2. Married	4. Higher education	2. Employed	1. The village	2. Two	4. Good - the budget covers the expenses related to the maintenance of the family; enough to pay for additional activities for the child and summer and winter holidays for the family
2023-06-01 14:41:25	B	Excessive extension of the head and shoulders forward	Watching TV in the wrong position, Using the Internet, playing games on mobile devices with the head set in the wrong position, Too long use of the mobile phone in the wrong position	C	Incorrect size of thoracic kyphosis	Incorrect body posture or rounding of the back while working at the computer, Too long use of the mobile phone in the wrong position	A	Incorrect size of lumbar lordosis	Abdominal muscle weakness, Walking in high-heeled shoes for a long time	C	Scoliosis	Long computer work in an asymmetrical sitting position, the habit of incorrect body posture in a sitting position during the day	B	Knee stying	Excessive extension of the lateral ligaments as a result of injury	A	Knee valgus	This abnormality is common in young children, mild cases are not a cause for concern	C	Flat foot	Over time, this problem contributes to the deformation of the ankle joint and causes pain, stretching (and weakness) of the plantar tendon and internal muscles of the foot	B	Toe valgus	Walking in high-heeled shoes, Walking in shoes that are too small and too narrow	C	This position is correct, because_x0002_the knee joints are not in the non_x0002_toural setting	A	This position is correct because the person uses the knee joints and thigh muscles to prevent spinal overload	B	This position is correct because the spine is correctly positioned, with properly preserved curves	C	This position is correct because the person walks straight, keeping his head in the correct position	B	This position is correct because the head and neck are in the correct position and the person is not looking down	C	This position is correct because the spine is in the right position	A	Such carrying a backpack is beneficial because it is put on both arms, Such carrying a backpack is beneficial - the straps of the backpack are properly adjusted, the backpack fits well to the back	C	This position is correct because the head and cervical spine are positioned correctly, This position is correct because the position of the entire spine is properly positioned, This position is correct and does not cause disturbances in body posture	3. 36 - 45 years	2. Woman	Schoolteacher	2. Married	4. Higher education	2. Employed	5. City with more than 200,000 inhabitants	2. Two	4. Good - the budget covers the expenses related to the maintenance of the family; enough to pay for additional activities for the child and summer and winter holidays for the family
2023-06-02 08:47:46	B	Excessive extension of the head and shoulders forward	Watching TV in the wrong position, Using the Internet, playing games on mobile devices with the head set in the wrong position, Too long use of the mobile phone in the wrong position	C	Incorrect size of lumbar lordosis	Incorrect body posture or rounding of the back while working at the computer, Too long time of standing, Too long use of the mobile phone in the wrong position	A	Incorrect size of thoracic kyphosis	Abdominal muscle weakening, Walking in high-heeled shoes for a long time, Performing physical exercises with weight and strengthening abdominal muscles	C	Scoliosis	Performing activities symmetrically, evenly straining both sides of the body, Long work at the computer in an asymmetrical sitting position, The habit of abnormal body posture in a sitting position during the day, Working in a standing position	B	Knee stying	Knee osteoarthritis, Excessive extension of the lateral ligaments a result of injury, Excessive supination of the foot/feet	A	Knee valgus	This abnormality is common in young children, mild cases are not a cause for concern, Asymmetry of the length of the lower limbs, If this defect occurs in children under 10 years of age, consult a specialist as soon as possible	C	Flat foot	Being in a standing position (walking and running) for too long, Over time, this problem contributes to the deformation of the ankle joint and causes pain, Stretching (and weakness) of the plantar extension and internal muscles of the foot	B	Toe valgus	Walking in high-heeled shoes, Walking in shoes that are too small and too narrow	C	This position is correct, because_x0002_the knee joints are not in the non_x0002_toural setting	A	This position is correct because the lumbar spine (back) is straight and its position prevents so-called low back pain, This position is correct because the person uses the knee joints and thigh muscles to prevent spinal overload	B	This position is correct because the spine is correctly positioned, with properly preserved curves	C	This position is correct because the person walks straight, keeping his head in the correct position	B	This position is correct because the head and neck are in the correct position and the person is not looking down, This position is correct because the entire spine is straight and in the right position	C	This position is correct because the spine is in the right position	A	Such carrying a backpack is beneficial because it is put on both arms, Such carrying a backpack is beneficial - the straps of the backpack are properly adjusted, the backpack fits well to the back	B	This position is correct and does not cause posture disorders	3. 36 - 45 years	2. Woman	University administrative employee	2. Married	4. Higher education	2. Employed	1. The village	2. Two	4. Good - the budget covers the expenses related to the maintenance of the family; enough to pay for additional activities for the child and summer and winter holidays for the family
2023-06-03 22:03:53	B	Excessive extension of the head and shoulders forward	Watching TV in the wrong position, Using the Internet, playing games on mobile devices with the head set in the wrong position, Too long use of the mobile phone in the wrong position	C	I don't know	Incorrect body posture or rounding of the back while working at the computer, Too long time of standing, Too long use of the mobile phone in the wrong position	A	Incorrect size of lumbar lordosis	Abdominal muscle weakness	C	Shoulders forward	The habit of incorrect body posture in a sitting position during the day	B	Knee stying	I don't know	A	Knee valgus	This abnormality is common in young children, mild cases are not a cause for concern	C	Flat foot	Stretching (and weakening) of the plantar tendon and internal muscles of the foot	B	Toe valgus	Walking in high-heeled shoes, Walking in shoes that are too small and too narrow	C	This position is correct, because_x0002_the knee joints are not in the non_x0002_toural setting	A	This position is correct because the person uses the knee joints and thigh muscles to prevent spinal overload	B	This position is correct because the spine is correctly positioned, with properly preserved curves	C	This position is correct because the person walks straight, keeping his head in the correct position	B	This position is correct because the head and neck are in the correct position and the person is not looking down	C	This position is correct because the spine is in the right position	A	It is beneficial to carry a backpack like this because it is worn on both shoulders	C	This position is correct because the position of the entire spine is properly positioned	3. 36 - 45 years	2. Woman	Schoolteacher	2. Married	4. Higher education	2. Employed	3. A city with a population of 10 to 50,000	2. Two	5. Very good - income allows you to spend money freely, does not limit expenses
2023-06-04 10:37:48	B	Excessive extension of the head and shoulders forward	Watching TV in the wrong position, Using the Internet, playing games on mobile devices with the head set in the wrong position, Too long use of the mobile phone in the wrong position	C	Incorrect size of lumbar lordosis	Incorrect body posture or rounding of the back while working at the computer, Too long use of the mobile phone in the wrong position	A	Incorrect size of thoracic kyphosis	Abdominal muscle weakness, Walking in high-heeled shoes for a long time	C	Scoliosis	Long computer work in an asymmetrical sitting position, the habit of incorrect body posture in a sitting position during the day	B	Knee stying	Excessive supination of the foot/feet	A	Knee valgus	If this defect occurs in children under 10 years of age, consult a specialist as soon as possible	C	Flat foot	Over time, this problem contributes to the deformation of the ankle joint and causes pain, stretching (and weakness) of the plantar tendon and internal muscles of the foot	B	Toe valgus	Walking in shoes that are too small and too narrow	C	This position is correct, because_x0002_the knee joints are not in the non_x0002_toural setting	A	This position is correct because the lumbar spine (back) is straight and its position prevents so-called low back pain, This position is correct because the person uses the knee joints and thigh muscles to prevent spinal overload	B	This position is correct because the spine is correctly positioned, with properly preserved curves	C	This position is correct because the person walks straight, keeping his head in the correct position	B	This position is correct because the head and neck are in the correct position and the person is not looking down, This position is correct because the entire spine is straight and in the right position	C	This position is correct because the spine is in the right position	A	Such carrying a backpack is beneficial because it is put on both arms, Such carrying a backpack is beneficial - the straps of the backpack are properly adjusted, the backpack fits well to the back	C	This position is correct because the head and cervical spine are positioned correctly, This position is correct because the position of the entire spine is properly positioned, This position is correct and does not cause disturbances in body posture	3. 36 - 45 years	2. Woman	Physical worker	2. Married	4. Higher education	2. Employed	1. The village	2. Two	4. Good - the budget covers the expenses related to the maintenance of the family; enough to pay for additional activities for the child and summer and winter holidays for the family
2023-06-04 10:58:59	B	Scoliosis	Too long use of the mobile phone in the wrong position	C	Incorrect size of lumbar lordosis	Incorrect body posture or rounding of the back while working at the computer	C	Incorrect size of thoracic kyphosis	Doing physical exercises with load and strengthening the abdominal muscles	C	Incorrect size of thoracic kyphosis	Performing activities symmetrically, evenly loading both sides of the body	B	Knee stying	Osteoarthritis of the knee joint	A	Knee valgus	If this defect occurs in children under 10 years of age, consult a specialist as soon as possible	C	Flat foot	I don't know	B	Toe valgus	Walking in high-heeled shoes	C	This position is correct because it reduces body weight	A	This position is correct because the lumbar spine (back) is straight and its position prevents so-called low back pain	B	This position is correct because the cervical spine is bent	C	This position is correct because the person walks straight, keeping his head in the correct position	B	This position is correct because the entire spine is erect and in the right position	C	This position is correct because the spine is in the right position	A	It is beneficial to carry a backpack like this because it is worn on both shoulders	C	This position is correct and does not cause posture disorders	3. 36 - 45 years	2. Woman	Administration technician	2. Married	3. High school/Technicum	2. Employed	1. The village	1. One thing	3. Average - the budget is enough for basic expenses related to the maintenance of the family, as well as to pay for additional activities for the child
2023-06-04 21:09:26	B	Scoliosis	Watching TV in the wrong position, Using the Internet, playing games on mobile devices with the head set in the wrong position, Too long use of the mobile phone in the wrong position	C	Incorrect size of thoracic kyphosis	Too long time in a standing position	A	Incorrect size of lumbar lordosis	Abdominal muscle weakness, Walking in high-heeled shoes for a long time	C	Scoliosis	Long computer work in an asymmetrical sitting position, the habit of incorrect body posture in a sitting position during the day	B	Knee valgus	Osteoarthritis of the knee joint	A	Knee stying	If this defect occurs in children under 10 years of age, consult a specialist as soon as possible	C	Flat foot	Over time, this problem contributes to the deformation of the ankle joint and causes pain	B	Toe valgus	Walking in high-heeled shoes, Walking in shoes that are too small and too narrow	C	This position is correct, because_x0002_the knee joints are not in the non_x0002_toural setting	A	This position is correct because the lumbar spine (back) is straight and its position prevents so-called low back pain, This position is correct because the person uses the knee joints and thigh muscles to prevent spinal overload	B	This position is correct because the spine is correctly positioned, with properly preserved curves	C	This position is correct because the person walks straight, keeping his head in the correct position	B	This position is correct because the head and neck are in the correct position and the person is not looking down	C	This position is correct because the spine is in the right position	A	Such carrying a backpack is beneficial because it is put on both arms, Such carrying a backpack is beneficial - the straps of the backpack are properly adjusted, the backpack fits well to the back	C	This position is correct because the head and cervical spine are correctly positioned	2. 26 - 30 years	2. Woman	The net worth	2. Married	4. Higher education	1. Unemployed	4. A city with a population of 50 to 200,000	1. One thing	3. Average - the budget is enough for basic expenses related to the maintenance of the family, as well as to pay for additional activities for the child
2023-06-04 21:38:25	B	Scoliosis	Watching TV in the wrong position, Using the Internet, playing games on mobile devices with the head set in the wrong position, Too long use of the mobile phone in the wrong position	C	Incorrect size of thoracic kyphosis	Incorrect body posture or rounding of the back while working at the computer, Too long time in a standing position	A	Incorrect size of lumbar lordosis	Abdominal muscle weakness	C	Scoliosis	The habit of incorrect body posture in a sitting position during the day	B	Knee valgus	Excessive supination of the foot/feet	A	Knee stying	This abnormality is common in young children, mild cases are not a cause for concern	C	Flat foot	Over time, this problem contributes to the deformation of the ankle joint and causes pain, stretching (and weakness) of the plantar tendon and internal muscles of the foot	B	Toe valgus	Walking in high-heeled shoes, Walking in shoes that are too small and too narrow	C	This position is correct, because_x0002_the knee joints are not in the non_x0002_toural setting	A	This position is correct because the lumbar spine (back) is straight and its position prevents so-called low back pain, This position is correct because the person uses the knee joints and thigh muscles to prevent spinal overload	B	This position is correct because the spine is correctly positioned, with properly preserved curves	C	This position is correct because the person walks straight, keeping his head in the correct position	B	This position is correct because the entire spine is erect and in the right position	C	This position is correct because the spine is in the right position	A	Such carrying a backpack is beneficial because it is put on both arms, Such carrying a backpack is beneficial - the straps of the backpack are properly adjusted, the backpack fits well to the back	C	This position is correct because the head and cervical spine are positioned correctly, This position is correct because the position of the entire spine is properly positioned, This position is correct and does not cause disturbances in body posture	1. Under 25 years of age	1. Man	Machine builder	2. Married	4. Higher education	2. Employed	4. A city with a population of 50 to 200,000	1. One thing	3. Average - the budget is enough for basic expenses related to the maintenance of the family, as well as to pay for additional activities for the child
2023-06-04 23:05:22	B	I don't know	Watching TV in the wrong position, Using the Internet, playing games on mobile devices with the head set in the wrong position, Too long use of the mobile phone in the wrong position	C	I don't know	Incorrect body posture or rounding of the back while working at the computer, Too long time of standing, Too long use of the mobile phone in the wrong position	A	Incorrect size of lumbar lordosis	I don't know	C	I don't know	The habit of incorrect body posture in a sitting position during the day, I don't know	B	Knee stying	I don't know	A	Knee valgus	I don't know	C	Flat foot	Over time, this problem contributes to ankle deformity and causes pain, I don't know	B	Toe valgus	Walking in high-heeled shoes, Walking in shoes that are too small and too narrow	C	I don't know	A	This position is correct because the lumbar spine (back) is straight and its position prevents so-called low back pain, This position is correct because the person uses the knee joints and thigh muscles to prevent spinal overload	B	This position is correct because the spine is correctly positioned, with properly preserved curves	C	This position is correct because the person walks straight, keeping his head in the correct position	B	This position is correct because the head and neck are in the correct position and the person is not looking down	C	This position is correct because the spine is in the right position	A	Such carrying a backpack is beneficial because it is put on both arms, Such carrying a backpack is beneficial - the straps of the backpack are properly adjusted, the backpack fits well to the back	C	This position is correct because the head and cervical spine are positioned correctly, This position is correct because the position of the entire spine is properly positioned	3. 36 - 45 years	2. Woman	Graphic designer	2. Married	4. Higher education	2. Employed	4. A city with a population of 50 to 200,000	2. Two	4. Good - the budget covers the expenses related to the maintenance of the family; enough to pay for additional activities for the child and summer and winter holidays for the family
2023-06-05 08:55:41	B	Excessive extension of the head and shoulders forward	Watching TV in the wrong position, Using the Internet, playing games on mobile devices with the head set in the wrong position, Too long use of the mobile phone in the wrong position	C	Incorrect size of thoracic kyphosis	Incorrect body posture or rounding of the back while working at the computer	C	Incorrect size of lumbar lordosis	Abdominal muscle weakness	C	Scoliosis	Long computer work in an asymmetrical sitting position, the habit of incorrect body posture in a sitting position during the day	B	Knee stying	Excessive stretching of the lateral ligaments as a result of injury, Excessive supination of the foot/feet	A	Knee valgus	This abnormality is common in young children, mild cases are not a cause for concern	C	Flat foot	Standing (walking and running) for too long, Stretching (and weakening) of the plantar and internal muscles of the foot	B	Toe valgus	Walking in shoes that are too small and too narrow	C	This position is correct, because_x0002_the knee joints are not in the non_x0002_toural setting	A	This position is correct because the lumbar spine (back) is straight and its position prevents so-called low back pain, This position is correct because the person uses the knee joints and thigh muscles to prevent spinal overload	B	This position is correct because the spine is correctly positioned, with properly preserved curves	C	This position is correct because the person walks straight, keeping his head in the correct position	B	This position is correct because the head and neck are in the correct position and the person is not looking down	C	This position is correct because the spine is in the right position	A	Such carrying a backpack is beneficial because it is put on both arms, Such carrying a backpack is beneficial - the straps of the backpack are properly adjusted, the backpack fits well to the back	C	This position is correct because the head and cervical spine are positioned correctly, This position is correct because the position of the entire spine is properly positioned, This position is correct and does not cause disturbances in body posture	3. 36 - 45 years	2. Woman	Schoolteacher	2. Married	4. Higher education	2. Employed	3. A city with a population of 10 to 50,000	2. Two	4. Good - the budget covers the expenses related to the maintenance of the family; enough to pay for additional activities for the child and summer and winter holidays for the family
2023-06-05 08:58:13	B	Scoliosis	Using the Internet, playing games on mobile devices with the head set in the wrong position	C	Scoliosis	Incorrect body posture or rounding of the back while working at the computer	A	Scoliosis	Abdominal muscle weakness	C	Scoliosis	The habit of incorrect body posture in a sitting position during the day	C	Bent contracture in the knee joints	Osteoarthritis of the knee joint	A	Knee stying	If this defect occurs in children under 10 years of age, consult a specialist as soon as possible	C	Flat foot	I don't know	B	Toe valgus	Walking in high-heeled shoes	C	This position is correct, because_x0002_the knee joints are not in the non_x0002_toural setting	A	This position is correct because the person uses the knee joints and thigh muscles to prevent spinal overload	A	This position is correct because the spine is correctly positioned, with properly preserved curves	C	This position is correct because the person walks straight, keeping his head in the correct position	A	This position is correct because the entire spine is erect and in the right position	C	This position is correct because the spine is in the right position	A	Such carrying a backpack is beneficial because it is put on both arms, Such carrying a backpack is beneficial - the straps of the backpack are properly adjusted, the backpack fits well to the back	C	This position is correct because the head and cervical spine are correctly positioned	4. Over 45 years old	2. Woman	Office worker	2. Married	3. High school/Technicum	4. Pensioner	5. City with more than 200,000 inhabitants	1. One thing	4. Good - the budget covers the expenses related to the maintenance of the family; enough to pay for additional activities for the child and summer and winter holidays for the family
2023-06-05 09:26:31	B	Excessive extension of the head and shoulders forward	Watching TV in the wrong position, Using the Internet, playing games on mobile devices with the head set in the wrong position, Too long use of the mobile phone in the wrong position	C	Incorrect size of thoracic kyphosis	Incorrect body posture or rounding of the back while working at the computer, Too long time of standing, Too long use of the mobile phone in the wrong position	A	Incorrect size of lumbar lordosis	I don't know	C	Incorrect size of thoracic kyphosis	Long computer work in an asymmetrical sitting position, the habit of incorrect body posture in a sitting position during the day	B	Knee valgus	Excessive supination of the foot/feet	A	I don't know	I don't know	C	Flat foot	Stretching (and weakening) of the plantar tendon and internal muscles of the foot	B	Toe valgus	Walking in high-heeled shoes, Walking in shoes that are too small and too narrow	C	This position is correct, because_x0002_the knee joints are not in the non_x0002_toural setting	A	This position is correct because the person uses the knee joints and thigh muscles to prevent spinal overload	B	This position is correct because the spine is correctly positioned, with properly preserved curves	C	This position is correct because the person walks straight, keeping his head in the correct position	B	This position is correct because the entire spine is erect and in the right position	C	This position is correct because the spine is in the right position	A	Such carrying a backpack is beneficial - the backpack straps are properly adjusted, the backpack adheres well to the back	C	This position is correct and does not cause posture disorders	4. Over 45 years old	2. Woman	Laboratory diagnostician	2. Married	4. Higher education	2. Employed	5. City with more than 200,000 inhabitants	1. One thing	4. Good - the budget covers the expenses related to the maintenance of the family; enough to pay for additional activities for the child and summer and winter holidays for the family
2023-06-05 10:06:22	B	Excessive extension of the head and shoulders forward	Using the Internet, playing games on mobile devices with the head set in the wrong position	C	Incorrect size of thoracic kyphosis	Too long use of the mobile phone in the wrong position	A	Incorrect size of lumbar lordosis	I don't know	C	Scoliosis	The habit of incorrect body posture in a sitting position during the day	B	Knee valgus	Osteoarthritis of the knee joint	A	Knee valgus	If this defect occurs in children under 10 years of age, consult a specialist as soon as possible	C	Flat foot	I don't know	B	Toe valgus	Walking in high-heeled shoes	C	This position is correct, because_x0002_the knee joints are not in the non_x0002_toural setting	A	This position is correct because the lumbar spine (back) is straight and its position prevents so-called low back pain	B	This position is correct because the spine is correctly positioned, with properly preserved curves	C	This position is correct because the person walks straight, keeping his head in the correct position	B	This position is correct because the entire spine is erect and in the right position	C	This position is correct because the spine is in the right position	A	It is beneficial to carry a backpack like this because it is worn on both shoulders	C	This position is correct and does not cause posture disorders	3. 36 - 45 years	2. Woman	Consultant	2. Married	4. Higher education	2. Employed	3. A city with a population of 10 to 50,000	2. Two	3. Average - the budget is enough for basic expenses related to the maintenance of the family, as well as to pay for additional activities for the child
2023-06-05 11:59:44	B	Excessive extension of the head and shoulders forward	Watching TV in the wrong position, Using the Internet, playing games on mobile devices with the head set in the wrong position, Too long use of the mobile phone in the wrong position	C	Incorrect size of thoracic kyphosis	Incorrect body posture or rounding of the back while working at the computer, Too long use of the mobile phone in the wrong position	A	Incorrect size of lumbar lordosis	Abdominal muscle weakness, Walking in high-heeled shoes for a long time	C	Scoliosis	Long computer work in an asymmetrical sitting position, the habit of incorrect body posture in a sitting position during the day	B	Knee stying	Degenerative disease of the knee joint, Excessive extension of the lateral ligaments a result of injury	A	Knee valgus	This abnormality is common in young children, mild cases are not a cause for concern	C	Flat foot	Being in a standing position (walking and running) for too long, Over time, this problem contributes to the deformation of the ankle joint and causes pain, Stretching (and weakness) of the plantar extension and internal muscles of the foot	B	Toe valgus	Walking in high-heeled shoes, Walking in shoes that are too small and too narrow	C	This position is correct, because_x0002_the knee joints are not in the non_x0002_toural setting	A	This position is correct because the lumbar spine (back) is straight and its position prevents so-called low back pain, This position is correct because the person uses the knee joints and thigh muscles to prevent spinal overload	B	This position is correct because the spine is correctly positioned, with properly preserved curves	C	This position is correct because the person walks straight, keeping his head in the correct position	B	This position is correct because the entire spine is erect and in the right position	C	This position is correct because the spine is in the right position	A	Such carrying a backpack is beneficial because it is put on both arms, Such carrying a backpack is beneficial - the straps of the backpack are properly adjusted, the backpack fits well to the back	C	This position is correct because the head and cervical spine are positioned correctly, This position is correct because the position of the entire spine is properly positioned, This position is correct and does not cause disturbances in body posture	4. Over 45 years old	2. Woman	Schoolteacher	2. Married	4. Higher education	2. Employed	1. The village	2. Two	4. Good - the budget covers the expenses related to the maintenance of the family; enough to pay for additional activities for the child and summer and winter holidays for the family
2023-06-05 17:09:29	B	I don't know	Using the Internet, playing games on mobile devices with the head set in the wrong position	C	I don't know	Incorrect body posture or rounding of the back while working at the computer	A	Incorrect size of thoracic kyphosis	Abdominal muscle weakness	C	I don't know	The habit of incorrect body posture in a sitting position during the day	B	Knee stying	I don't know	A	Knee valgus	I don't know	C	Flat foot	I don't know	B	Toe valgus	Walking in high-heeled shoes	C	I don't know	A	This position is correct because the person uses the knee joints and thigh muscles to prevent spinal overload	B	This position is correct because the spine is correctly positioned, with properly preserved curves	C	I don't know	B	I don't know	C	This position is correct because the spine is in the right position	A	Such carrying a backpack is beneficial - the backpack straps are properly adjusted, the backpack adheres well to the back	C	I don't know	3. 36 - 45 years	2. Woman	Registrar	2. Married	4. Higher education	2. Employed	2. The city is up to 10,000 inhabitants	2. Two	3. Average - the budget is enough for basic expenses related to the maintenance of the family, as well as to pay for additional activities for the child
2023-06-05 20:23:38	B	Excessive extension of the head and shoulders forward	Watching TV in the wrong position, Using the Internet, playing games on mobile devices with the head set in the wrong position, Too long use of the mobile phone in the wrong position	C	Incorrect size of thoracic kyphosis	Incorrect body posture or rounding of the back while working at the computer	A	Incorrect size of lumbar lordosis	Abdominal muscle weakness	C	Scoliosis	Long computer work in an asymmetrical sitting position, the habit of incorrect body posture in a sitting position during the day	B	Knee stying	Osteoarthritis of the knee joint	A	Knee valgus	If this defect occurs in children under 10 years of age, consult a specialist as soon as possible	C	Flat foot	Over time, this problem contributes to the deformation of the ankle joint and causes pain	B	Toe valgus	Walking in shoes that are too small and too narrow	C	This position is correct, because_x0002_the knee joints are not in the non_x0002_toural setting	A	This position is correct because the lumbar spine (back) is straight and its position prevents so-called low back pain, This position is correct because the person uses the knee joints and thigh muscles to prevent spinal overload	B	This position is correct because the spine is correctly positioned, with properly preserved curves	C	This position is correct because the person walks straight, keeping his head in the correct position	B	This position is correct because the head and neck are in the correct position and the person is not looking down, This position is correct because the entire spine is straight and in the right position	C	This position is correct because the spine is in the right position	A	Such carrying a backpack is beneficial because it is put on both arms, Such carrying a backpack is beneficial - the straps of the backpack are properly adjusted, the backpack fits well to the back	C	This position is correct because the head and cervical spine are positioned correctly, This position is correct because the position of the entire spine is properly positioned, This position is correct and does not cause disturbances in body posture	4. Over 45 years old	1. Man	Builder	2. Married	3. High school/Technicum	2. Employed	4. A city with a population of 50 to 200,000	2. Two	4. Good - the budget covers the expenses related to the maintenance of the family; enough to pay for additional activities for the child and summer and winter holidays for the family
2023-06-05 21:22:14	B	Excessive extension of the head and shoulders forward	Using the Internet, playing games on mobile devices with the head set in the wrong position	C	Incorrect size of thoracic kyphosis	Too long time in a standing position	A	Incorrect size of lumbar lordosis	Abdominal muscle weakness	C	Scoliosis	The habit of incorrect body posture in a sitting position during the day	B	Knee stying	Excessive supination of the foot/feet	A	Knee valgus	If this defect occurs in children under 10 years of age, consult a specialist as soon as possible	C	Flat foot	Stretching (and weakening) of the plantar tendon and internal muscles of the foot	B	Toe valgus	Walking in shoes that are too small and too narrow	C	This position is correct, because_x0002_the knee joints are not in the non_x0002_toural setting	A	This position is correct because the person uses the knee joints and thigh muscles to prevent spinal overload	B	This position is correct because the spine is correctly positioned, with properly preserved curves	C	This position is correct because the person walks straight, keeping his head in the correct position	B	This position is correct because the entire spine is erect and in the right position	C	This position is correct because the spine is in the right position	A	Such carrying a backpack is beneficial - the backpack straps are properly adjusted, the backpack adheres well to the back	C	This position is correct and does not cause posture disorders	4. Over 45 years old	1. Man	Economist	2. Married	4. Higher education	2. Employed	4. A city with a population of 50 to 200,000	2. Two	4. Good - the budget covers the expenses related to the maintenance of the family; enough to pay for additional activities for the child and summer and winter holidays for the family
2023-06-06 19:29:12	B	Excessive extension of the head and shoulders forward	Using the Internet, playing games on mobile devices with the head set in the wrong position	C	Incorrect size of thoracic kyphosis	Incorrect body posture or rounding of the back while working at the computer, Too long use of the mobile phone in the wrong position	A	Incorrect size of lumbar lordosis	Abdominal muscle weakness	C	Scoliosis	Long computer work in an asymmetrical sitting position, the habit of incorrect body posture in a sitting position during the day	B	Knee stying	Excessive supination of the foot/feet	A	Knee valgus	This abnormality is common in young children, mild cases are not a cause for concern	C	Flat foot	Over time, this problem contributes to the deformation of the ankle joint and causes pain, stretching (and weakness) of the plantar tendon and internal muscles of the foot	B	Toe valgus	Walking in high-heeled shoes, Walking in shoes that are too small and too narrow	C	This position is correct, because_x0002_the knee joints are not in the non_x0002_toural setting	A	This position is correct because the person uses the knee joints and thigh muscles to prevent spinal overload	B	This position is correct because the spine is correctly positioned, with properly preserved curves	C	This position is correct because the person walks straight, keeping his head in the correct position	B	This position is correct because the head and neck are in the correct position and the person is not looking down	C	This position is correct because the spine is in the right position	A	It is beneficial to carry a backpack like this because it is worn on both shoulders	C	This position is correct because the head and cervical spine are positioned correctly, This position is correct because the position of the entire spine is properly positioned, This position is correct and does not cause disturbances in body posture	4. Over 45 years old	2. Woman	Scientist	2. Married	4. Higher education	2. Employed	5. City with more than 200,000 inhabitants	2. Two	5. Very good - income allows you to spend money freely, does not limit expenses
2023-06-06 21:52:46	B	Excessive extension of the head and shoulders forward	I don't know	C	I don't know	I don't know	A	Scoliosis	I don't know	C	I don't know	I don't know	B	I don't know	I don't know	A	Knee valgus	I don't know	C	Flat foot	I don't know	B	Toe valgus	Walking in high-heeled shoes	C	I don't know	A	This position is correct because the lumbar spine (back) is straight and its position prevents so-called low back pain, This position is correct because the person uses the knee joints and thigh muscles to prevent spinal overload	B	This position is correct because the spine is correctly positioned, with properly preserved curves	C	This position is correct because the person walks straight, keeping his head in the correct position	B	This position is correct because the entire spine is erect and in the right position	C	This position is correct because the spine is in the right position	A	It is beneficial to carry a backpack like this because it is worn on both shoulders	C	This position is correct and does not cause posture disorders	3. 36 - 45 years	1. Man	Electrician	2. Married	4. Higher education	2. Employed	1. The village	2. Two	4. Good - the budget covers the expenses related to the maintenance of the family; enough to pay for additional activities for the child and summer and winter holidays for the family
2023-06-06 22:34:50	B	Excessive extension of the head and shoulders forward	Watching TV in the wrong position, Using the Internet, playing games on mobile devices with the head set in the wrong position, Too long use of the mobile phone in the wrong position	C	Incorrect size of thoracic kyphosis	Incorrect body posture or rounding of the back while working at the computer, Too long use of the mobile phone in the wrong position	A	Incorrect size of lumbar lordosis	Abdominal muscle weakness	C	Scoliosis	Long computer work in an asymmetrical sitting position, the habit of incorrect body posture in a sitting position during the day	B	Knee valgus	Excessive supination of the foot/feet	A	I don't know	This abnormality is common in young children, mild cases are not a cause for concern	C	Flat foot	Over time, this problem contributes to the deformation of the ankle joint and causes pain, stretching (and weakness) of the plantar tendon and internal muscles of the foot	B	Toe valgus	Walking in high-heeled shoes, Walking in shoes that are too small and too narrow	C	This position is correct, because_x0002_the knee joints are not in the non_x0002_toural setting	A	This position is correct because the lumbar spine (back) is straight and its position prevents so-called low back pain, This position is correct because the person uses the knee joints and thigh muscles to prevent spinal overload	B	This position is correct because the spine is correctly positioned, with properly preserved curves	C	This position is correct because the person walks straight, keeping his head in the correct position	B	This position is correct because the head and neck are in the correct position and the person is not looking down, This position is correct because the entire spine is straight and in the right position	C	This position is correct because the spine is in the right position	A	Such carrying a backpack is beneficial because it is put on both arms, Such carrying a backpack is beneficial - the straps of the backpack are properly adjusted, the backpack fits well to the back	C	This position is correct because the head and cervical spine are positioned correctly, This position is correct because the position of the entire spine is properly positioned, This position is correct and does not cause disturbances in body posture	3. 36 - 45 years	2. Woman	Office work	2. Married	4. Higher education	2. Employed	5. City with more than 200,000 inhabitants	1. One thing	3. Average - the budget is enough for basic expenses related to the maintenance of the family, as well as to pay for additional activities for the child
2023-06-07 15:28:41	B	Excessive extension of the head and shoulders forward	Using the Internet, playing games on mobile devices with the head set in the wrong position, Too long use of the mobile phone in the wrong position	C	Incorrect size of thoracic kyphosis	Incorrect body posture or rounding of the back while working at the computer, Too long time of standing, Too long use of the mobile phone in the wrong position	A	Incorrect size of lumbar lordosis	Abdominal muscle weakness	C	Incorrect size of thoracic kyphosis	Performing activities symmetrically, evenly straining both sides of the body, the habit of incorrect body posture in a sitting position during the day	B	Knee valgus	Knee osteoarthritis, walking barefoot on a hard floor	A	Knee stying	This abnormality is common in young children, mild cases are not a cause for concern, If this defect occurs in children under 10 years of age, consult a specialist as soon as possible	C	Flat foot	Being in a standing position (walking and running) for too long, Over time, this problem contributes to the deformation of the ankle joint and causes pain, Running	B	Toe valgus	Walking in high-heeled shoes, Walking in shoes that are too small and too narrow	C	This position is correct, ponie_x0002_waż knee joints are not in non_x0002_tural position, This position is correct because it reduces body weight	A	This position is correct because the lumbar spine (back) is straight and its position prevents so-called low back pain, This position is correct because the person uses the knee joints and thigh muscles to prevent spinal overload	B	This position is correct because the spine is correctly positioned, with properly preserved curves	C	This position is correct because the person walks straight, keeping his head in the correct position	B	This position is correct because the entire spine is erect and in the right position	C	This position is correct because the spine is in the right position	A	Such carrying a backpack is beneficial because it is put on both arms, Such carrying a backpack is beneficial - the straps of the backpack are properly adjusted, the backpack fits well to the back	C	This position is correct because the head and cervical spine are positioned correctly, This position is correct because the position of the entire spine is properly positioned, This position is correct and does not cause disturbances in body posture	3. 36 - 45 years	2. Woman	Academic teacher	2. Married	4. Higher education	2. Employed	1. The village	2. Two	4. Good - the budget covers the expenses related to the maintenance of the family; enough to pay for additional activities for the child and summer and winter holidays for the family
2023-06-07 15:38:17	B	Excessive extension of the head and shoulders forward	Watching TV in the wrong position, Using the Internet, playing games on mobile devices with the head set in the wrong position, Too long use of the mobile phone in the wrong position	C	Incorrect size of thoracic kyphosis	Incorrect body posture or rounding of the back while working at the computer, Too long time of standing, Too long use of the mobile phone in the wrong position	A	Incorrect size of lumbar lordosis	Abdominal muscle weakness	C	Scoliosis	Long work at the computer in an asymmetrical sitting position	B	Knee stying	Osteoarthritis of the knee joint	A	Knee valgus	This abnormality is common in young children, mild cases are not a cause for concern	C	Flat foot	Stretching (and weakening) of the plantar tendon and internal muscles of the foot	B	Toe valgus	Walking in shoes that are too small and too narrow	B	This position is correct, because_x0002_the knee joints are not in the non_x0002_toural setting	A	This position is correct because the lumbar spine (back) is straight and its position prevents so-called low back pain, This position is correct because the person uses the knee joints and thigh muscles to prevent spinal overload	B	This position is correct because the spine is correctly positioned, with properly preserved curves	C	This position is correct because the person walks straight, keeping his head in the correct position	B	This position is correct because the head and neck are in the correct position and the person is not looking down, This position is correct because the entire spine is straight and in the right position	C	This position is correct because the spine is in the right position	A	Such carrying a backpack is beneficial because it is put on both arms, Such carrying a backpack is beneficial - the straps of the backpack are properly adjusted, the backpack fits well to the back	C	This position is correct because the head and cervical spine are positioned correctly, This position is correct because the position of the entire spine is properly positioned, This position is correct and does not cause disturbances in body posture	4. Over 45 years old	2. Woman	Schoolteacher	2. Married	4. Higher education	2. Employed	5. City with more than 200,000 inhabitants	3. Three	4. Good - the budget covers the expenses related to the maintenance of the family; enough to pay for additional activities for the child and summer and winter holidays for the family
2023-06-07 21:28:46	B	Scoliosis	Watching TV in the wrong position, Using the Internet, playing games on mobile devices with the head set in the wrong position, Too long use of the mobile phone in the wrong position	C	Incorrect size of lumbar lordosis	Incorrect body posture or rounding of the back while working at the computer, Too long time of standing, Too long use of the mobile phone in the wrong position	A	Incorrect size of lumbar lordosis	Abdominal muscle weakness, Walking in high-heeled shoes for a long time	C	Scoliosis	Long computer work in an asymmetrical sitting position, the habit of incorrect body posture in a sitting position during the day	B	Knee valgus	Osteoarthritis of the knee joint	A	Knee valgus	If this defect occurs in children under 10 years of age, consult a specialist as soon as possible	C	Flat foot	I don't know	B	Toe valgus	Walking in high-heeled shoes	C	This position is correct, because_x0002_the knee joints are not in the non_x0002_toural setting	A	This position is correct because the lumbar spine (back) is straight and its position prevents so-called low back pain, This position is correct because the person uses the knee joints and thigh muscles to prevent spinal overload	B	This position is correct because the spine is correctly positioned, with properly preserved curves	C	This position is correct because the person walks straight, keeping his head in the correct position	B	This position is correct because the head and neck are in the correct position and the person is not looking down, This position is correct because the entire spine is straight and in the right position	C	This position is correct because the spine is in the right position	A	Such carrying a backpack is beneficial because it is put on both arms, Such carrying a backpack is beneficial - the straps of the backpack are properly adjusted, the backpack fits well to the back	C	This position is correct because the head and cervical spine are positioned correctly, This position is correct because the position of the entire spine is properly positioned, This position is correct and does not cause disturbances in body posture	3. 36 - 45 years	2. Woman	Seller	2. Married	2. Vocational school	5. Other	1. The village	2. Two	2. Ebad - the budget meets only the basic expenses related to the maintenance of the family
2023-06-08 10:43:52	B	Excessive extension of the head and shoulders forward	Watching TV in the wrong position, Using the Internet, playing games on mobile devices with the head set in the wrong position, Too long use of the mobile phone in the wrong position	C	Incorrect size of thoracic kyphosis	Incorrect body posture or rounding of the back while working at the computer, Too long use of the mobile phone in the wrong position	A	Incorrect size of lumbar lordosis	Abdominal muscle weakness, Walking in high-heeled shoes for a long time	C	Scoliosis	Long computer work in an asymmetrical sitting position, the habit of incorrect body posture in a sitting position during the day	B	Knee valgus	Excessive supination of the foot/feet	A	Knee valgus	If this defect occurs in children under 10 years of age, consult a specialist as soon as possible	C	Flat foot	Over time, this problem contributes to the deformation of the ankle joint and causes pain, stretching (and weakness) of the plantar tendon and internal muscles of the foot	B	Toe valgus	Walking in high-heeled shoes, Walking in shoes that are too small and too narrow	C	This position is correct, ponie_x0002_waż knee joints are not in non_x0002_tural position, This position is correct because it reduces body weight	A	This position is correct because the lumbar spine (back) is straight and its position prevents so-called low back pain, This position is correct because the person uses the knee joints and thigh muscles to prevent spinal overload	B	This position is correct because the spine is correctly positioned, with properly preserved curves	C	This position is correct because the person walks straight, keeping his head in the correct position	B	This position is correct because the head and neck are in the correct position and the person is not looking down, This position is correct because the entire spine is straight and in the right position	C	This position is correct because the spine is in the right position	A	It is beneficial to carry a backpack like this because it is worn on both shoulders	C	This position is correct because the head and cervical spine are positioned correctly, This position is correct because the position of the entire spine is properly positioned, This position is correct and does not cause disturbances in body posture	3. 36 - 45 years	1. Man	Scientist	2. Married	4. Higher education	2. Employed	5. City with more than 200,000 inhabitants	2. Two	4. Good - the budget covers the expenses related to the maintenance of the family; enough to pay for additional activities for the child and summer and winter holidays for the family
2023-06-08 11:40:27	B	Excessive extension of the head and shoulders forward	Watching TV in the wrong position, Using the Internet, playing games on mobile devices with the head set in the wrong position, Too long use of the mobile phone in the wrong position	C	Incorrect size of thoracic kyphosis	Incorrect body posture or rounding of the back while working at the computer	A	Incorrect size of lumbar lordosis	Abdominal muscle weakness, Walking in high-heeled shoes for a long time	C	Scoliosis	Long computer work in an asymmetrical sitting position, the habit of incorrect body posture in a sitting position during the day	B	Knee stying	Degenerative disease of the knee joint, Excessive extension of the lateral ligaments a result of injury	A	Knee valgus	If this defect occurs in children under 10 years of age, consult a specialist as soon as possible	C	Flat foot	Over time, this problem contributes to the deformation of the ankle joint and causes pain, stretching (and weakness) of the plantar tendon and internal muscles of the foot	B	Toe valgus	Walking in high-heeled shoes, Walking in shoes that are too small and too narrow	C	This position is correct, because_x0002_the knee joints are not in the non_x0002_toural setting	A	This position is correct because the lumbar spine (back) is straight and its position prevents so-called low back pain, This position is correct because the person uses the knee joints and thigh muscles to prevent spinal overload	B	This position is correct because the spine is correctly positioned, with properly preserved curves	C	This position is correct because the person walks straight, keeping his head in the correct position	B	This position is correct because the entire spine is erect and in the right position	C	This position is correct because the spine is in the right position	A	Such carrying a backpack is beneficial because it is put on both arms, Such carrying a backpack is beneficial - the straps of the backpack are properly adjusted, the backpack fits well to the back	C	This position is correct because the position of the entire spine is properly positioned, This position is correct and does not cause disturbances in body posture	4. Over 45 years old	1. Man	Schoolteacher	2. Married	4. Higher education	2. Employed	1. The village	2. Two	3. Average - the budget is enough for basic expenses related to the maintenance of the family, as well as to pay for additional activities for the child
2023-06-09 08:49:52	B	I don't know	Too long use of the mobile phone in the wrong position	C	I don't know	Incorrect body posture or rounding of the back while working at the computer, Too long use of the mobile phone in the wrong position	B	I don't know	I don't know	A	I don't know	I don't know	B	Knee valgus	Osteoarthritis of the knee joint	C	Knee valgus	If this defect occurs in children under 10 years of age, consult a specialist as soon as possible	B	Flat foot	I don't know	A	I don't know	I don't know	C	I don't know	A	This position is correct because the lumbar spine (back) is straight and its position prevents so-called low back pain	B	This position is correct because the spine is correctly positioned, with properly preserved curves	C	This position is correct because the person walks straight, keeping his head in the correct position	B	This position is correct because the head and neck are in the correct position and the person is not looking down	C	This position is correct because the spine is in the right position	A	Such carrying a backpack is beneficial because it is put on both arms, Such carrying a backpack is beneficial - the straps of the backpack are properly adjusted, the backpack fits well to the back	C	This position is correct because the head and cervical spine are positioned correctly, This position is correct and does not cause disturbances in body posture	3. 36 - 45 years	2. Woman	Office worker	2. Married	4. Higher education	2. Employed	4. A city with a population of 50 to 200,000	1. One thing	4. Good - the budget covers the expenses related to the maintenance of the family; enough to pay for additional activities for the child and summer and winter holidays for the family
2023-06-09 09:54:55	B	Excessive extension of the head and shoulders forward	Watching TV in the wrong position, Using the Internet, playing games on mobile devices with the head set in the wrong position, Too long use of the mobile phone in the wrong position	C	Incorrect size of thoracic kyphosis	Incorrect body posture or rounding of the back while working at the computer, Too long use of the mobile phone in the wrong position	A	Incorrect size of lumbar lordosis	Abdominal muscle weakness	C	Scoliosis	Long computer work in an asymmetrical sitting position, the habit of incorrect body posture in a sitting position during the day	B	Knee stying	I don't know	A	Knee valgus	If this defect occurs in children under 10 years of age, consult a specialist as soon as possible	C	Flat foot	Over time, this problem contributes to the deformation of the ankle joint and causes pain	B	Toe valgus	Walking in shoes that are too small and too narrow	C	This position is correct, because_x0002_the knee joints are not in the non_x0002_toural setting	A	This position is correct because the lumbar spine (back) is straight and its position prevents so-called low back pain, This position is correct because the person uses the knee joints and thigh muscles to prevent spinal overload	B	This position is correct because the spine is correctly positioned, with properly preserved curves	C	This position is correct because the person walks straight, keeping his head in the correct position	B	This position is correct because the head and neck are in the correct position and the person is not looking down, This position is correct because the entire spine is straight and in the right position	C	This position is correct because the spine is in the right position	A	Such carrying a backpack is beneficial because it is put on both arms, Such carrying a backpack is beneficial - the straps of the backpack are properly adjusted, the backpack fits well to the back	C	This position is correct because the head and cervical spine are positioned correctly, This position is correct because the position of the entire spine is properly positioned, This position is correct and does not cause disturbances in body posture	3. 36 - 45 years	2. Woman	Biotechnologist	2. Married	4. Higher education	2. Employed	5. City with more than 200,000 inhabitants	2. Two	4. Good - the budget covers the expenses related to the maintenance of the family; enough to pay for additional activities for the child and summer and winter holidays for the family
2023-06-09 13:33:50	B	Excessive extension of the head and shoulders forward	Watching TV in the wrong position, Using the Internet, playing games on mobile devices with the head set in the wrong position, Too long use of the mobile phone in the wrong position	C	Incorrect size of thoracic kyphosis	Incorrect body posture or rounding of the back while working at the computer, Too long use of the mobile phone in the wrong position	A	Incorrect size of lumbar lordosis	Abdominal muscle weakness	C	Scoliosis	Long computer work in an asymmetrical sitting position, the habit of incorrect body posture in a sitting position during the day	B	Knee valgus	Excessive stretching of the lateral ligaments as a result of injury, Excessive supination of the foot/feet	A	Knee valgus	This abnormality is common in young children, mild cases are not a cause for concern, If this defect occurs in children under 10 years of age, consult a specialist as soon as possible	C	Flat foot	Stretching (and weakening) of the plantar tendon and internal muscles of the foot	B	Toe valgus	Walking in high-heeled shoes, Walking in shoes that are too small and too narrow	C	This position is correct, because_x0002_the knee joints are not in the non_x0002_toural setting	A	This position is correct because the lumbar spine (back) is straight and its position prevents so-called low back pain	B	This position is correct because the spine is correctly positioned, with properly preserved curves	C	This position is correct because the person walks straight, keeping his head in the correct position	B	This position is correct because the head and neck are in the correct position and the person is not looking down	C	This position is correct because the spine is in the right position	A	Such carrying a backpack is beneficial because it is put on both arms, Such carrying a backpack is beneficial - the straps of the backpack are properly adjusted, the backpack fits well to the back	C	This position is correct because the position of the entire spine is properly positioned	4. Over 45 years old	2. Woman	Schoolteacher	2. Married	4. Higher education	2. Employed	1. The village	2. Two	4. Good - the budget covers the expenses related to the maintenance of the family; enough to pay for additional activities for the child and summer and winter holidays for the family
2023-06-09 13:48:09	B	Scoliosis	Using the Internet, playing games on mobile devices with the head set in the wrong position	C	Scoliosis	Too long use of the mobile phone in the wrong position	A	I don't know	Abdominal muscle weakness	C	I don't know	Long work at the computer in an asymmetrical sitting position	B	I don't know	Osteoarthritis of the knee joint	A	I don't know	I don't know	C	Flat foot	I don't know	B	Toe valgus	I don't know	B	This position is correct, because_x0002_the knee joints are not in the non_x0002_toural setting	A	This position is correct because the person uses the knee joints and thigh muscles to prevent spinal overload	B	This position is correct because the spine is correctly positioned, with properly preserved curves	C	This position is correct because the person walks straight, keeping his head in the correct position	B	This position is correct because the head and neck are in the correct position and the person is not looking down	C	This position is correct because the spine is in the right position	A	Such carrying a backpack is beneficial - the backpack straps are properly adjusted, the backpack adheres well to the back	B	This position is correct and does not cause posture disorders	3. 36 - 45 years	1. Man	Office worker	2. Married	4. Higher education	2. Employed	4. A city with a population of 50 to 200,000	2. Two	4. Good - the budget covers the expenses related to the maintenance of the family; enough to pay for additional activities for the child and summer and winter holidays for the family
2023-06-09 19:44:31	A	I don't know	I don't know	A	I don't know	I don't know	A	I don't know	I don't know	A	I don't know	I don't know	A	Knee stying	Excessive supination of the foot/feet	A	Knee stying	I don't know	C	Flat foot	Stretching (and weakening) of the plantar tendon and internal muscles of the foot	A	I don't know	I don't know	C	This position is correct, because_x0002_the knee joints are not in the non_x0002_toural setting	B	This position is correct because the spine is bent to reduce the weight of the object	B	This position is correct because the spine is correctly positioned, with properly preserved curves	C	This position is correct because the person walks straight, keeping his head in the correct position	B	This position is correct because the entire spine is erect and in the right position	C	This position is correct because the spine is in the right position	A	Such carrying a backpack is beneficial - the backpack straps are properly adjusted, the backpack adheres well to the back	B	This position is correct because the position of the entire spine is properly positioned	4. Over 45 years old	1. Man	The entrenchant	2. Married	4. Higher education	3. Own business	1. The village	2. Two	5. Very good - income allows you to spend money freely, does not limit expenses
2023-06-09 20:58:02	B	Excessive extension of the head and shoulders forward	Watching TV in the wrong position, Using the Internet, playing games on mobile devices with the head set in the wrong position, Too long use of the mobile phone in the wrong position	C	Incorrect size of thoracic kyphosis	Incorrect body posture or rounding of the back while working at the computer, Too long use of the mobile phone in the wrong position	A	Incorrect size of lumbar lordosis	Abdominal muscle weakness, Walking in high-heeled shoes for a long time	C	Scoliosis	Long computer work in an asymmetrical sitting position, the habit of incorrect body posture in a sitting position during the day	B	Knee stying	Excessive extension of the lateral ligaments as a result of injury	A	Knee valgus	This abnormality is common in young children, mild cases are not a cause for concern	C	Flat foot	Over time, this problem contributes to the deformation of the ankle joint and causes pain, stretching (and weakness) of the plantar tendon and internal muscles of the foot	B	Toe valgus	Walking in high-heeled shoes, Walking in shoes that are too small and too narrow	C	This position is correct, because_x0002_the knee joints are not in the non_x0002_toural setting	A	This position is correct because the lumbar spine (back) is straight and its position prevents so-called low back pain, This position is correct because the person uses the knee joints and thigh muscles to prevent spinal overload	B	This position is correct because the spine is correctly positioned, with properly preserved curves	C	This position is correct because the person walks straight, keeping his head in the correct position	B	This position is correct because the head and neck are in the correct position and the person is not looking down, This position is correct because the entire spine is straight and in the right position	C	This position is correct because the spine is in the right position	A	Such carrying a backpack is beneficial because it is put on both arms, Such carrying a backpack is beneficial - the straps of the backpack are properly adjusted, the backpack fits well to the back	C	This position is correct because the head and cervical spine are positioned correctly, This position is correct because the position of the entire spine is properly positioned, This position is correct and does not cause disturbances in body posture	3. 36 - 45 years	2. Woman	Schoolteacher	2. Married	4. Higher education	2. Employed	5. City with more than 200,000 inhabitants	2. Two	4. Good - the budget covers the expenses related to the maintenance of the family; enough to pay for additional activities for the child and summer and winter holidays for the family
2023-06-09 22:34:56	B	Excessive extension of the head and shoulders forward	Too long use of the mobile phone in the wrong position	C	Incorrect size of thoracic kyphosis	Too long use of the mobile phone in the wrong position	A	Incorrect size of lumbar lordosis	Walking in high-heeled shoes for a long time	C	Scoliosis	Long work at the computer in an asymmetrical sitting position	B	Knee stying	Osteoarthritis of the knee joint	A	Knee valgus	If this defect occurs in children under 10 years of age, consult a specialist as soon as possible	C	Flat foot	Stretching (and weakening) of the plantar tendon and internal muscles of the foot	B	Toe valgus	Walking in shoes that are too small and too narrow	C	This position is correct, because_x0002_the knee joints are not in the non_x0002_toural setting	A	This position is correct because the lumbar spine (back) is straight and its position prevents so-called low back pain	B	This position is correct because the spine is correctly positioned, with properly preserved curves	C	This position is correct because the person walks straight, keeping his head in the correct position	B	This position is correct because the entire spine is erect and in the right position	C	This position is correct because the spine is in the right position	A	Such carrying a backpack is beneficial - the backpack straps are properly adjusted, the backpack adheres well to the back	C	This position is correct and does not cause posture disorders	3. 36 - 45 years	1. Man	Architect	2. Married	4. Higher education	3. Own business	4. A city with a population of 50 to 200,000	2. Two	3. Average - the budget is enough for basic expenses related to the maintenance of the family, as well as to pay for additional activities for the child
2023-06-10 09:13:49	B	Excessive extension of the head and shoulders forward	Watching TV in the wrong position, Using the Internet, playing games on mobile devices with the head set in the wrong position, Too long use of the mobile phone in the wrong position	C	Asymmetrical shoulder positioning	Incorrect body posture or rounding of the back while working at the computer, Too long use of the mobile phone in the wrong position	A	Shoulders forward	I don't know	C	Scoliosis	Long computer work in an asymmetrical sitting position, the habit of incorrect body posture in a sitting position during the day	B	I don't know	I don't know	A	I don't know	I don't know	C	Flat foot	I don't know	B	Toe valgus	Walking in high-heeled shoes	C	This position is correct, because_x0002_the knee joints are not in the non_x0002_toural setting	A	This position is correct because the lumbar spine (back) is straight and its position prevents so-called low back pain, This position is correct because the person uses the knee joints and thigh muscles to prevent spinal overload	B	This position is correct because the spine is correctly positioned, with properly preserved curves	C	This position is correct because the person walks straight, keeping his head in the correct position	B	This position is correct because the head and neck are in the correct position and the person is not looking down, This position is correct because the entire spine is straight and in the right position	C	This position is correct because the spine is in the right position	A	Such carrying a backpack is beneficial because it is put on both arms, Such carrying a backpack is beneficial - the straps of the backpack are properly adjusted, the backpack fits well to the back	C	This position is correct because the head and cervical spine are positioned correctly, This position is correct because the position of the entire spine is properly positioned, This position is correct and does not cause disturbances in body posture	3. 36 - 45 years	1. Man	Sales manager	2. Married	4. Higher education	2. Employed	4. A city with a population of 50 to 200,000	2. Two	3. Average - the budget is enough for basic expenses related to the maintenance of the family, as well as to pay for additional activities for the child
2023-06-10 14:58:42	B	Excessive extension of the head and shoulders forward	Watching TV in the wrong position, Using the Internet, playing games on mobile devices with the head set in the wrong position, Too long use of the mobile phone in the wrong position	C	Incorrect size of thoracic kyphosis	Incorrect body posture or rounding of the back while working at the computer, Too long use of the mobile phone in the wrong position	A	Incorrect size of lumbar lordosis	Abdominal muscle weakening, Walking in high-heeled shoes for a long time, Performing physical exercises with weight and strengthening abdominal muscles	C	Scoliosis	Performing activities symmetrically, evenly straining both sides of the body, the habit of incorrect body posture in a sitting position during the day	B	Knee stying	I don't know	A	Knee valgus	This abnormality is common in young children, mild cases are not a cause for concern	C	Flat foot	Stretching (and weakening) of the plantar tendon and internal muscles of the foot	B	Toe valgus	Walking in high-heeled shoes, Walking in shoes that are too small and too narrow	C	This position is correct, because_x0002_because the knee joints are not in the non_x0002_toural setting, This position is correct because it makes children taller	A	This position is correct because the person uses the knee joints and thigh muscles to prevent spinal overload	B	This position is correct because the spine is correctly positioned, with properly preserved curves	C	This position is correct because the person walks straight, keeping his head in the correct position	B	This position is correct because the head and neck are in the correct position and the person is not looking down	C	This position is correct because the spine is in the right position	A	It is beneficial to carry a backpack like this because it is worn on both shoulders	C	This position is correct because the head and cervical spine are positioned correctly, This position is correct and does not cause disturbances in body posture	3. 36 - 45 years	2. Woman	Schoolteacher	2. Married	4. Higher education	2. Employed	3. A city with a population of 10 to 50,000	2. Two	4. Good - the budget covers the expenses related to the maintenance of the family; enough to pay for additional activities for the child and summer and winter holidays for the family
2023-06-10 15:12:57	B	Excessive extension of the head and shoulders forward	Watching TV in the wrong position, Using the Internet, playing games on mobile devices with the head set in the wrong position, Too long use of the mobile phone in the wrong position	C	Incorrect size of thoracic kyphosis	Incorrect body posture or rounding of the back while working at the computer, Too long use of the mobile phone in the wrong position	A	Incorrect size of lumbar lordosis	Walking in high-heeled shoes for a long time	C	Scoliosis	Long computer work in an asymmetrical sitting position, the habit of incorrect body posture in a sitting position during the day	B	Knee stying	Osteoarthritis of the knee joint	A	Knee valgus	If this defect occurs in children under 10 years of age, consult a specialist as soon as possible	C	Flat foot	Stretching (and weakening) of the plantar tendon and internal muscles of the foot	B	Toe valgus	Walking in shoes that are too small and too narrow	C	This position is correct, because_x0002_the knee joints are not in the non_x0002_toural setting	A	This position is correct because the lumbar spine (back) is straight and its position prevents so-called low back pain	B	This position is correct because the spine is correctly positioned, with properly preserved curves	C	This position is correct because the person walks straight, keeping his head in the correct position	B	This position is correct because the entire spine is erect and in the right position	C	This position is correct because the spine is in the right position	A	Such carrying a backpack is beneficial because it is put on both arms, Such carrying a backpack is beneficial - the straps of the backpack are properly adjusted, the backpack fits well to the back	B	This position is correct because the head and cervical spine are positioned correctly, This position is correct because the position of the entire spine is properly positioned	3. 36 - 45 years	1. Man	Scientist	2. Married	4. Higher education	2. Employed	5. City with more than 200,000 inhabitants	2. Two	4. Good - the budget covers the expenses related to the maintenance of the family; enough to pay for additional activities for the child and summer and winter holidays for the family
2023-06-11 08:41:31	B	Excessive extension of the head and shoulders forward	Watching TV in the wrong position, Using the Internet, playing games on mobile devices with the head set in the wrong position	C	Incorrect size of thoracic kyphosis	Incorrect body posture or rounding of the back while working at the computer, Too long time of standing, Too long use of the mobile phone in the wrong position	A	Incorrect size of lumbar lordosis	Abdominal muscle weakness	C	Scoliosis	Long computer work in an asymmetrical sitting position, the habit of incorrect body posture in a sitting position during the day	B	Knee stying	Excessive extension of the lateral ligaments as a result of injury	A	Knee valgus	This abnormality is common in young children, mild cases are not a cause for concern, If this defect occurs in children under 10 years of age, consult a specialist as soon as possible	C	Flat foot	Over time, this problem contributes to the deformation of the ankle joint and causes pain, stretching (and weakness) of the plantar tendon and internal muscles of the foot	B	Toe valgus	Walking in high-heeled shoes, Walking in shoes that are too small and too narrow	C	This position is correct, because_x0002_the knee joints are not in the non_x0002_toural setting	A	This position is correct because the lumbar spine (back) is straight and its position prevents so-called low back pain, This position is correct because the person uses the knee joints and thigh muscles to prevent spinal overload	B	This position is correct because the spine is correctly positioned, with properly preserved curves, This position is correct because the computer screen is above eye level	C	This position is correct because the person walks straight, keeping his head in the correct position	B	This position is correct because the head and neck are in the correct position and the person is not looking down, This position is correct because the entire spine is straight and in the right position	C	This position is correct because the spine is in the right position	A	Such carrying a backpack is beneficial because it is put on both arms, Such carrying a backpack is beneficial - the straps of the backpack are properly adjusted, the backpack fits well to the back	C	This position is correct because the position of the entire spine is properly positioned, This position is correct and does not cause disturbances in body posture	4. Over 45 years old	1. Man	Academic teacher	2. Married	4. Higher education	2. Employed	4. A city with a population of 50 to 200,000	3. Three	4. Good - the budget covers the expenses related to the maintenance of the family; enough to pay for additional activities for the child and summer and winter holidays for the family
2023-06-11 10:59:22	B	Excessive extension of the head and shoulders forward	Watching TV in the wrong position, Using the Internet, playing games on mobile devices with the head set in the wrong position, Too long use of the mobile phone in the wrong position	C	Incorrect size of thoracic kyphosis	Incorrect body posture or rounding of the back while working at the computer, Too long use of the mobile phone in the wrong position	A	Incorrect size of lumbar lordosis	I don't know	C	I don't know	Long computer work in an asymmetrical sitting position, the habit of incorrect body posture in a sitting position during the day	B	Knee stying	Osteoarthritis of the knee joint, Excessive supination of the foot/foot	A	Knee valgus	If this defect occurs in children under 10 years of age, consult a specialist as soon as possible, I do not know	C	Flat foot	Stretching (and weakening) of the plantar tendon and internal muscles of the foot, I don't know	B	Toe valgus	Walking in shoes that are too small and too narrow	C	This position is correct because it reduces body weight	A	This position is correct because the lumbar spine (back) is straight and its position prevents so-called low back pain, This position is correct because the person uses the knee joints and thigh muscles to prevent spinal overload	B	This position is correct because the spine is correctly positioned, with properly preserved curves	C	This position is correct because the person walks straight, keeping his head in the correct position	B	This position is correct because the head and neck are in the correct position and the person is not looking down	C	This position is correct because the spine is in the right position	A	Such carrying a backpack is beneficial because it is put on both arms, Such carrying a backpack is beneficial - the straps of the backpack are properly adjusted, the backpack fits well to the back	C	This position is correct because the head and cervical spine are set correctly, This position is correct because the position of the entire spine is properly positioned, This position is correct and does not cause posture disturbances, NoI know	3. 36 - 45 years	2. Woman	Graphic designer	2. Married	4. Higher education	2. Employed	4. A city with a population of 50 to 200,000	2. Two	4. Good - the budget covers the expenses related to the maintenance of the family; enough to pay for additional activities for the child and summer and winter holidays for the family
2023-06-11 22:00:02	B	Excessive extension of the head and shoulders forward	Watching TV in the wrong position, Using the Internet, playing games on mobile devices with the head set in the wrong position, Too long use of the mobile phone in the wrong position	C	Incorrect size of thoracic kyphosis	Incorrect body posture or rounding of the back while working at the computer, Too long time of standing, Too long use of the mobile phone in the wrong position	A	Incorrect size of lumbar lordosis	Abdominal muscle weakness	C	Scoliosis	Long computer work in an asymmetrical sitting position, the habit of incorrect body posture in a sitting position during the day	B	Knee valgus	Excessive supination of the foot/feet	A	Knee stying	This abnormality is common in young children, mild cases are not a cause for concern, If this defect occurs in children under 10 years of age, consult a specialist as soon as possible	C	Flat foot	Stretching (and weakening) of the plantar tendon and internal muscles of the foot	B	Toe valgus	Walking in high-heeled shoes, Walking in shoes that are too small and too narrow	C	This position is correct, ponie_x0002_waż knee joints are not in non_x0002_tural position, This position is correct because it reduces body weight	A	This position is correct because the lumbar spine (back) is straight and its position prevents so-called low back pain, This position is correct because the person uses the knee joints and thigh muscles to prevent spinal overload	B	This position is correct because the spine is correctly positioned, with properly preserved curves	C	This position is correct because the person walks straight, keeping his head in the correct position	B	This position is correct because the entire spine is erect and in the right position	C	This position is correct because the spine is in the right position	A	Such carrying a backpack is beneficial because it is put on both arms, Such carrying a backpack is beneficial - the straps of the backpack are properly adjusted, the backpack fits well to the back	C	This position is correct because the head and cervical spine are positioned correctly, This position is correct because the position of the entire spine is properly positioned, This position is correct and does not cause disturbances in body posture	1. Under 25 years of age	1. Man	Constructor	2. Married	4. Higher education	2. Employed	4. A city with a population of 50 to 200,000	1. One thing	3. Average - the budget is enough for basic expenses related to the maintenance of the family, as well as to pay for additional activities for the child
2023-06-11 22:04:02	B	Excessive extension of the head and shoulders forward	Using the Internet, playing games on mobile devices with the head set in the wrong position, Too long use of the mobile phone in the wrong position	C	Incorrect size of lumbar lordosis	Incorrect body posture or rounding of the back while working at the computer, Habitual performance of daily activities with a dominant hand	A	Incorrect size of thoracic kyphosis	Abdominal muscle weakness	C	Scoliosis	Performing activities symmetrically, evenly straining both sides of the body, the habit of incorrect body posture in a sitting position during the day	B	Knee valgus	I don't know	A	Knee stying	If this defect occurs in children under 10 years of age, consult a specialist as soon as possible	C	Flat foot	I don't know	B	Hammery fingers	Walking in high-heeled shoes, Walking in shoes that are too small and too narrow, Walking in shoes	C	This position is correct, because_x0002_the knee joints are not in the non_x0002_toural setting	A	This position is correct because the lumbar spine (back) is straight and its position prevents so-called low back pain	B	This position is correct because the spine is correctly positioned, with properly preserved curves	C	This position is correct because the person walks straight, keeping his head in the correct position	B	This position is correct because the head and neck are in the correct position and the person is not looking down	C	This position is correct because the spine is in the right position	A	Such carrying a backpack is beneficial because it is put on both arms, Such carrying a backpack is beneficial - the straps of the backpack are properly adjusted, the backpack fits well to the back	C	This position is correct because the head and cervical spine are positioned correctly, This position is correct because the position of the entire spine is properly positioned	2. 26 - 30 years	2. Woman	The net worth	2. Married	4. Higher education	1. Unemployed	4. A city with a population of 50 to 200,000	1. One thing	3. Average - the budget is enough for basic expenses related to the maintenance of the family, as well as to pay for additional activities for the child
2023-06-12 09:15:33	B	Excessive extension of the head and shoulders forward	Watching TV in the wrong position, Using the Internet, playing games on mobile devices with the head set in the wrong position, Too long use of the mobile phone in the wrong position	C	Incorrect size of thoracic kyphosis	Incorrect body posture or rounding of the back while working at the computer	A	Incorrect size of lumbar lordosis	Abdominal muscle weakening, performing physical exercises with load and strengthening abdominal muscles	C	Scoliosis	Long computer work in an asymmetrical sitting position, the habit of incorrect body posture in a sitting position during the day	B	Knee valgus	Osteoarthritis of the knee joint	A	Knee stying	This abnormality is common in young children, mild cases are not a cause for concern	C	Flat foot	Over time, this problem contributes to the deformation of the ankle joint and causes pain	B	Toe valgus	Walking in shoes that are too small and too narrow	C	This position is correct, because_x0002_the knee joints are not in the non_x0002_toural setting	A	This position is correct because the lumbar spine (back) is straight and its position prevents so-called low back pain	B	This position is correct because the spine is correctly positioned, with properly preserved curves	C	This position is correct because the person walks straight, keeping his head in the correct position	B	This position is correct because the head and neck are in the correct position and the person is not looking down	C	This position is correct because the spine is in the right position	A	It is beneficial to carry a backpack like this because it is worn on both shoulders	C	This position is correct because the head and cervical spine are correctly positioned	3. 36 - 45 years	2. Woman	Academic teacher	2. Married	4. Higher education	2. Employed	1. The village	2. Two	4. Good - the budget covers the expenses related to the maintenance of the family; enough to pay for additional activities for the child and summer and winter holidays for the family
2023-06-12 10:32:44	B	Excessive extension of the head and shoulders forward	Watching TV in the wrong position, Using the Internet, playing games on mobile devices with the head set in the wrong position, Too long use of the mobile phone in the wrong position	C	Incorrect size of thoracic kyphosis	Incorrect body posture or rounding of the back while working at the computer, Too long time of standing, Too long use of the mobile phone in the wrong position	A	Incorrect size of lumbar lordosis	Abdominal muscle weakening, Walking in high-heeled shoes for a long time, Performing physical exercises with weight and strengthening abdominal muscles	C	Scoliosis	Long work at the computer in an asymmetric sitting position, The habit of incorrect body posture in a sitting position during the day, Working in a standing position	B	Knee stying	Knee osteoarthritis, Excessive extension of the lateral ligaments a result of injury, Excessive supination of the foot/feet	A	Knee valgus	Asymmetry of the length of the lower limbs, If this defect occurs in children under 10 years of age, consult a specialist as soon as possible	C	Flat foot	Being in a standing position (walking and running) for too long, Over time, this problem contributes to the deformation of the ankle joint and causes pain, Stretching (and weakness) of the plantar extension and internal muscles of the foot	B	Toe valgus	Walking in high-heeled shoes, Walking in shoes that are too small and too narrow	C	This position is correct, because_x0002_the knee joints are not in the non_x0002_toural setting	A	This position is correct because the lumbar spine (back) is straight and its position prevents so-called back pain, This position is correct because the spine is bent to reduce the weight of the object, This position is correct because danAnd the person uses the knee joints and thigh muscles to prevent spinal overload	B	This position is correct because the spine is correctly positioned, with properly preserved curves	C	This position is correct because the person walks straight, keeping his head in the correct position	B	This position is correct because the head and neck are in the correct position and the person is not looking down	C	This position is correct because the spine is in the right position	A	It is beneficial to carry a backpack like this because it is worn on both shoulders		This position is correct because the head and cervical spine are positioned correctly, This position is correct because the position of the entire spine is properly positioned	3. 36 - 45 years	2. Woman	Employee of the University administration	2. Married	4. Higher education	2. Employed	1. The village	2. Two	4. Good - the budget covers the expenses related to the maintenance of the family; enough to pay for additional activities for the child and summer and winter holidays for the family
2023-06-12 10:33:00	B	Scoliosis	Watching TV in the wrong position, Using the Internet, playing games on mobile devices with the head set in the wrong position, Too long use of the mobile phone in the wrong position	C	Incorrect size of lumbar lordosis	Incorrect body posture or rounding of the back while working at the computer, Too long time in a standing position	A	Incorrect size of thoracic kyphosis	Abdominal muscle weakness, I don't know	C	Scoliosis	Long computer work in an asymmetrical sitting position, the habit of incorrect body posture in a sitting position during the day	B	Knee valgus	Excessive supination of the foot/feet	A	Knee stying	I don't know	C	Flat foot	Stretching (and weakening) of the plantar tendon and internal muscles of the foot	B	Toe valgus	Walking in shoes that are too small and too narrow	C	This position is correct, because_x0002_the knee joints are not in the non_x0002_toural setting	A	This position is correct because the person uses the knee joints and thigh muscles to prevent spinal overload	B	This position is correct because the spine is correctly positioned, with properly preserved curves	C	This position is correct because the person walks straight, keeping his head in the correct position	B	This position is correct because the entire spine is erect and in the right position	C	This position is correct because the spine is in the right position	A	Such carrying a backpack is beneficial - the backpack straps are properly adjusted, the backpack adheres well to the back	C	This position is correct and does not cause posture disorders	4. Over 45 years old	2. Woman	Laboratory diagnosticist	2. Married	4. Higher education	2. Employed	5. City with more than 200,000 inhabitants	1. One thing	4. Good - the budget covers the expenses related to the maintenance of the family; enough to pay for additional activities for the child and summer and winter holidays for the family
2023-06-12 11:20:25	B	Excessive extension of the head and shoulders forward	Watching TV in the wrong position, Using the Internet, playing games on mobile devices with the head set in the wrong position, Too long use of the mobile phone in the wrong position	C	Incorrect size of thoracic kyphosis	Incorrect body posture or rounding of the back while working at the computer, Too long use of the mobile phone in the wrong position	A	Shoulders forward	Abdominal muscle weakness, Walking in high-heeled shoes for a long time	C	I don't know	Performing activities symmetrically, evenly loading both sides of the body	B	Knee valgus	Osteoarthritis of the knee joint	A	Knee valgus	If this defect occurs in children under 10 years of age, consult a specialist as soon as possible	C	Flat foot	Stretching (and weakening) of the plantar tendon and internal muscles of the foot	B	Toes	I don't know	C	This position is correct because it reduces body weight, This position is correct because it makes children taller	A	This position is correct because the lumbar spine (back) is straight and its position prevents so-called low back pain	B	This position is correct because the spine is correctly positioned, with properly preserved curves	C	This position is correct because the person walks straight, keeping his head in the correct position	A	This position is correct because the head and neck are in the correct position and the person is not looking down	C	This position is correct because the spine is in the right position	A	It is beneficial to carry a backpack like this because it is worn on both shoulders	A	I don't know	2. 26 - 30 years	2. Woman	Unemployed	2. Married	2. Vocational school	1. Unemployed	1. The village	2. Two	4. Good - the budget covers the expenses related to the maintenance of the family; enough to pay for additional activities for the child and summer and winter holidays for the family
2023-06-12 14:23:36	B	Excessive extension of the head and shoulders forward	Watching TV in the wrong position, Using the Internet, playing games on mobile devices with the head set in the wrong position, Too long use of the mobile phone in the wrong position	B	I don't know	Incorrect body posture or rounding of the back while working at the computer, Too long time of standing, Too long use of the mobile phone in the wrong position	A	Incorrect size of lumbar lordosis	Abdominal muscle weakness, I don't know	C	Scoliosis	Performing activities symmetrically, evenly straining both sides of the body, The habit of incorrect body posture in a sitting position during the day, Working in a standing position	B	I don't know	I don't know	A	Knee valgus	If this defect occurs in children under 10 years of age, consult a specialist as soon as possible	C	Flat foot	Over time, this problem contributes to the deformation of the ankle joint and causes pain	B	Toe valgus	Walking in high-heeled shoes, Walking in shoes that are too small and too narrow	B	This position is correct, because_x0002_the knee joints are not in the non_x0002_toural setting	A	This position is correct because the lumbar spine (back) is straight and its position prevents so-called low back pain	B	This position is correct because the spine is correctly positioned, with properly preserved curves	C	This position is correct because the person walks straight, keeping his head in the correct position	B	This position is correct because the head and neck are in the correct position and the person is not looking down	C	This position is correct because the spine is in the right position	A	It is beneficial to carry a backpack like this because it is worn on both shoulders	C	This position is correct because the head and cervical spine are correctly positioned	3. 36 - 45 years	2. Woman	Administrative work	2. Married	4. Higher education	2. Employed	5. City with more than 200,000 inhabitants	3. Three	4. Good - the budget covers the expenses related to the maintenance of the family; enough to pay for additional activities for the child and summer and winter holidays for the family
2023-06-12 16:15:36	B	Excessive extension of the head and shoulders forward	Using the Internet, playing games on mobile devices with the head set in the wrong position	C	Incorrect size of thoracic kyphosis	Incorrect body posture or rounding of the back while working at the computer	A	Incorrect size of lumbar lordosis	Abdominal muscle weakness	C	Scoliosis	Long computer work in an asymmetrical sitting position, the habit of incorrect body posture in a sitting position during the day	B	Knee stying	Excessive extension of the lateral ligaments as a result of injury	A	Knee valgus	This abnormality is common in young children, mild cases are not a cause for concern, This arrangement of the knee joints does not affect body posture	C	Flat foot	Stretching (and weakening) of the plantar tendon and internal muscles of the foot	B	Toe valgus	Walking in high-heeled shoes, Walking in shoes that are too small and too narrow	C	This position is correct, because_x0002_the knee joints are not in the non_x0002_toural setting	A	This position is correct because the lumbar spine (back) is straight and its position prevents so-called low back pain, This position is correct because the person uses the knee joints and thigh muscles to prevent spinal overload	B	This position is correct because the spine is correctly positioned, with properly preserved curves	C	This position is correct because the person walks straight, keeping his head in the correct position	B	This position is correct because the head and neck are in the correct position and the person is not looking down	C	This position is correct because the spine is in the right position	A	Such carrying a backpack is beneficial because it is put on both arms, Such carrying a backpack is beneficial - the straps of the backpack are properly adjusted, the backpack fits well to the back	C	This position is correct because the head and cervical spine are positioned correctly, This position is correct because the position of the entire spine is properly positioned, This position is correct and does not cause disturbances in body posture	4. Over 45 years old	2. Woman	Academic teacher	2. Married	4. Higher education	2. Employed	5. City with more than 200,000 inhabitants	2. Two	5. Very good - income allows you to spend money freely, does not limit expenses
2023-06-12 17:33:07	B	Excessive extension of the head and shoulders forward	Using the Internet, playing games on mobile devices with the head set in the wrong position, Too long use of the mobile phone in the wrong position	C	Incorrect size of lumbar lordosis	Incorrect body posture or rounding of the back while working at the computer, Too long time in a standing position	A	Incorrect size of lumbar lordosis	Abdominal muscle weakness	C	Scoliosis	Long computer work in an asymmetrical sitting position, the habit of incorrect body posture in a sitting position during the day	B	Knee valgus	Osteoarthritis of the knee joint	C	Bent contracture in the knee joints	If this defect occurs in children under 10 years of age, consult a specialist as soon as possible	C	Flat foot	Stretching (and weakening) of the plantar tendon and internal muscles of the foot	B	Toe valgus	Walking in high-heeled shoes, Walking in shoes that are too small and too narrow	C	This position is correct, ponie_x0002_waż knee joints are not in non_x0002_tural position, This position is correct because it reduces body weight	A	This position is correct because the person uses the knee joints and thigh muscles to prevent spinal overload	B	This position is correct because the spine is correctly positioned, with properly preserved curves	C	This position is correct because the person walks straight, keeping his head in the correct position	A	This position is correct because the head and neck are in the correct position and the person is not looking down	C	This position is correct because the spine is in the right position	A	Such carrying a backpack is beneficial - the backpack straps are properly adjusted, the backpack adheres well to the back	C	This position is correct because the head and cervical spine are positioned correctly, This position is correct because the position of the entire spine is properly positioned, This position is correct and does not cause disturbances in body posture	4. Over 45 years old	2. Woman	Office worker	2. Married	3. High school/Technicum	4. Pensioner	5. City with more than 200,000 inhabitants	1. One thing	4. Good - the budget covers the expenses related to the maintenance of the family; enough to pay for additional activities for the child and summer and winter holidays for the family
2023-06-12 19:07:24	B	Scoliosis	Using the Internet, playing games on mobile devices with the head set in the wrong position	C	Incorrect size of thoracic kyphosis	Incorrect body posture or rounding of the back while working at the computer	A	Incorrect size of lumbar lordosis	Walking in high-heeled shoes for a long time	C	Scoliosis	The habit of incorrect body posture in a sitting position during the day	B	Knee valgus	I don't know	A	Knee stying	If this defect occurs in children under 10 years of age, consult a specialist as soon as possible	C	Flat foot	Stretching (and weakening) of the plantar tendon and internal muscles of the foot	B	Toe valgus	Walking in shoes that are too small and too narrow	C	This position is correct because it makes children taller	A	This position is correct because the lumbar spine (back) is straight and its position prevents so-called low back pain	B	This position is correct because the spine is correctly positioned, with properly preserved curves	C	This position is correct because the person walks straight, keeping his head in the correct position	B	This position is correct because the entire spine is erect and in the right position	C	This position is correct because the lower limbs are in a crossed position	A	Such carrying a backpack is beneficial - the backpack straps are properly adjusted, the backpack adheres well to the back	C	This position is correct because the head and cervical spine are correctly positioned	3. 36 - 45 years	1. Man	Free	2. Married	3. High school/Technicum	3. Own business	4. A city with a population of 50 to 200,000	4. Four or more	4. Good - the budget covers the expenses related to the maintenance of the family; enough to pay for additional activities for the child and summer and winter holidays for the family
2023-06-12 20:46:51	B	Excessive extension of the head and shoulders forward	Using the Internet, playing games on mobile devices with the head set in the wrong position	B	Incorrect size of thoracic kyphosis	Incorrect body posture or rounding of the back while working at the computer	A	Incorrect size of lumbar lordosis	Abdominal muscle weakness	C	Scoliosis	The habit of incorrect body posture in a sitting position during the day	B	Knee stying	Excessive supination of the foot/feet	A	Knee valgus	If this defect occurs in children under 10 years of age, consult a specialist as soon as possible	C	Flat foot	Stretching (and weakening) of the plantar tendon and internal muscles of the foot	B	Toe valgus	Walking in shoes that are too small and too narrow	C	This position is correct, because_x0002_the knee joints are not in the non_x0002_toural setting	A	This position is correct because the lumbar spine (back) is straight and its position prevents so-called low back pain, This position is correct because the person uses the knee joints and thigh muscles to prevent spinal overload	B	This position is correct because the spine is correctly positioned, with properly preserved curves	C	This position is correct because the person walks straight, keeping his head in the correct position	B	This position is correct because the head and neck are in the correct position and the person is not looking down	C	This position is correct because the spine is in the right position	A	Such carrying a backpack is beneficial - the backpack straps are properly adjusted, the backpack adheres well to the back	C	This position is correct and does not cause posture disorders	4. Over 45 years old	1. Man	Economist	2. Married	4. Higher education	2. Employed	4. A city with a population of 50 to 200,000	2. Two	4. Good - the budget covers the expenses related to the maintenance of the family; enough to pay for additional activities for the child and summer and winter holidays for the family
2023-06-13 07:31:11	B	Excessive extension of the head and shoulders forward	Using the Internet, playing games on mobile devices with the head set in the wrong position	C	Incorrect size of thoracic kyphosis	Too long use of the mobile phone in the wrong position	A	Shoulders forward	Walking in high-heeled shoes for a long time	C	Scoliosis	The habit of incorrect body posture in a sitting position during the day	B	Knee stying	I don't know	A	Knee valgus	If this defect occurs in children under 10 years of age, consult a specialist as soon as possible	C	Flat foot	Over time, this problem contributes to the deformation of the ankle joint and causes pain	B	Toe valgus	Walking in high-heeled shoes	C	This position is correct, because_x0002_the knee joints are not in the non_x0002_toural setting	A	This position is correct because the person uses the knee joints and thigh muscles to prevent spinal overload	B	This position is correct because the spine is correctly positioned, with properly preserved curves	C	This position is correct because the person walks straight, keeping his head in the correct position	B	This position is correct because the entire spine is erect and in the right position	C	This position is correct because the spine is in the right position	A	It is beneficial to carry a backpack like this because it is worn on both shoulders	C	I don't know	3. 36 - 45 years	2. Woman	Consultant	2. Married	4. Higher education	2. Employed	3. A city with a population of 10 to 50,000	2. Two	3. Average - the budget is enough for basic expenses related to the maintenance of the family, as well as to pay for additional activities for the child
2023-06-13 08:25:30	B	Excessive extension of the head and shoulders forward	Watching TV in the wrong position, Using the Internet, playing games on mobile devices with the head set in the wrong position, Too long use of the mobile phone in the wrong position	C	Incorrect size of lumbar lordosis	Incorrect body posture or rounding of the back while working at the computer, Too long use of the mobile phone in the wrong position	A	Incorrect size of thoracic kyphosis	Abdominal muscle weakness	C	Scoliosis	Long computer work in an asymmetrical sitting position, the habit of incorrect body posture in a sitting position during the day	B	Knee stying	Degenerative disease of the knee joint, Excessive extension of the lateral ligaments a result of injury	A	Knee valgus	This abnormality is common in young children, mild cases are not a cause for concern	C	Flat foot	Over time, this problem contributes to the deformation of the ankle joint and causes pain, stretching (and weakness) of the plantar tendon and internal muscles of the foot	B	Toe valgus	Walking in high-heeled shoes, Walking in shoes that are too small and too narrow	C	This position is correct, because_x0002_the knee joints are not in the non_x0002_toural setting	A	This position is correct because the lumbar spine (back) is straight and its position prevents so-called low back pain, This position is correct because the person uses the knee joints and thigh muscles to prevent spinal overload	B	This position is correct because the spine is correctly positioned, with properly preserved curves	C	This position is correct because the person walks straight, keeping his head in the correct position	B	This position is correct because the head and neck are in the correct position and the person is not looking down, This position is correct because the entire spine is straight and in the right position	C	This position is correct because the spine is in the right position	A	Such carrying a backpack is beneficial because it is put on both arms, Such carrying a backpack is beneficial - the straps of the backpack are properly adjusted, the backpack fits well to the back	C	This position is correct because the head and cervical spine are positioned correctly, This position is correct because the position of the entire spine is properly positioned, This position is correct and does not cause disturbances in body posture	3. 36 - 45 years	2. Woman	Office worker	2. Married	4. Higher education	2. Employed	5. City with more than 200,000 inhabitants	1. One thing	3. Average - the budget is enough for basic expenses related to the maintenance of the family, as well as to pay for additional activities for the child
2023-06-13 19:04:46	B	Excessive extension of the head and shoulders forward	Using the Internet, playing games on mobile devices with the head set in the wrong position, Too long use of the mobile phone in the wrong position	C	Incorrect size of thoracic kyphosis	Incorrect body posture or rounding of the back while working at the computer, Too long use of the mobile phone in the wrong position	A	Incorrect size of lumbar lordosis	Abdominal muscle weakness, Walking in high-heeled shoes for a long time	C	Scoliosis	Long computer work in an asymmetrical sitting position, the habit of incorrect body posture in a sitting position during the day	B	Knee stying	Excessive stretching of the lateral ligaments as a result of injury, Excessive supination of the foot/feet	A	Knee valgus	This abnormality is common in young children, mild cases are not a cause for concern	C	Flat foot	Standing (walking and running) for too long, Stretching (and weakening) of the plantar and internal muscles of the foot	B	Toe valgus	Walking in shoes that are too small and too narrow	B	This position is correct, because_x0002_the knee joints are not in the non_x0002_toural setting	A	This position is correct because the lumbar spine (back) is straight and its position prevents so-called low back pain, This position is correct because the person uses the knee joints and thigh muscles to prevent spinal overload	B	This position is correct because the spine is correctly positioned, with properly preserved curves	C	This position is correct because the person walks straight, keeping his head in the correct position	B	This position is correct because the head and neck are in the correct position and the person is not looking down, This position is correct because the entire spine is straight and in the right position	C	This position is correct because the spine is in the right position	A	Such carrying a backpack is beneficial because it is put on both arms, Such carrying a backpack is beneficial - the straps of the backpack are properly adjusted, the backpack fits well to the back	C	This position is correct because the head and cervical spine are positioned correctly, This position is correct because the position of the entire spine is properly positioned, This position is correct and does not cause disturbances in body posture	3. 36 - 45 years	2. Woman	The teacher	2. Married	4. Higher education	2. Employed	3. A city with a population of 10 to 50,000	2. Two	4. Good - the budget covers the expenses related to the maintenance of the family; enough to pay for additional activities for the child and summer and winter holidays for the family
2023-06-13 19:30:19	B	Excessive extension of the head and shoulders forward	Watching TV in the wrong position, Using the Internet, playing games on mobile devices with the head set in the wrong position	C	Incorrect size of thoracic kyphosis	Incorrect body posture or rounding of the back while working at the computer	A	Incorrect size of lumbar lordosis	Abdominal muscle weakness	C	Scoliosis	Long computer work in an asymmetrical sitting position, the habit of incorrect body posture in a sitting position during the day	B	Knee stying	Osteoarthritis of the knee joint	A	Knee valgus	I don't know	C	Flat foot	Stretching (and weakening) of the plantar tendon and internal muscles of the foot	B	Toe valgus	Walking in shoes that are too small and too narrow	C	This position is correct, because_x0002_the knee joints are not in the non_x0002_toural setting	A	This position is correct because the lumbar spine (back) is straight and its position prevents so-called low back pain, This position is correct because the person uses the knee joints and thigh muscles to prevent spinal overload	B	This position is correct because the spine is correctly positioned, with properly preserved curves	C	This position is correct because the person walks straight, keeping his head in the correct position	B	This position is correct because the head and neck are in the correct position and the person is not looking down, This position is correct because the entire spine is straight and in the right position	C	This position is correct because the spine is in the right position	A	Such carrying a backpack is beneficial because it is put on both arms, Such carrying a backpack is beneficial - the straps of the backpack are properly adjusted, the backpack fits well to the back	C	This position is correct because the head and cervical spine are positioned correctly, This position is correct because the position of the entire spine is properly positioned, This position is correct and does not cause disturbances in body posture	4. Over 45 years old	1. Man	Construction worker	2. Married	3. High school/Technicum	2. Employed	4. A city with a population of 50 to 200,000	2. Two	4. Good - the budget covers the expenses related to the maintenance of the family; enough to pay for additional activities for the child and summer and winter holidays for the family
2023-06-13 20:16:27	B	Excessive extension of the head and shoulders forward	I don't know	C	I don't know	I don't know	A	Scoliosis	Abdominal muscle weakness	C	I don't know	I don't know	B	I don't know	I don't know	A	I don't know	I don't know	C	Flat foot	I don't know	B	I don't know	I don't know	A	I don't know	A	I don't know	B	This position is correct because the spine is correctly positioned, with properly preserved curves	C	This position is correct because the person walks straight, keeping his head in the correct position	B	This position is correct because the entire spine is erect and in the right position	C	I don't know	A	Such carrying a backpack is beneficial - the backpack straps are properly adjusted, the backpack adheres well to the back	C	I don't know	3. 36 - 45 years	1. Man	Electrician	2. Married	4. Higher education	2. Employed	1. The village	2. Two	4. Good - the budget covers the expenses related to the maintenance of the family; enough to pay for additional activities for the child and summer and winter holidays for the family
2023-06-13 20:27:17	B	Excessive extension of the head and shoulders forward	I don't know	C	Incorrect size of thoracic kyphosis	Incorrect body posture or rounding of the back while working at the computer	A	Incorrect size of lumbar lordosis	I don't know	C	I don't know	I don't know	B	Knee stying	I don't know	A	Knee valgus	I don't know	C	Flat foot	I don't know	B	Toe valgus	Walking in shoes that are too small and too narrow	C	I don't know	B	This position is correct because the person uses the knee joints and thigh muscles to prevent spinal overload	B	This position is correct because the spine is correctly positioned, with properly preserved curves	C	This position is correct because the person walks straight, keeping his head in the correct position	B	I don't know	C	This position is correct because the spine is in the right position	A	It is beneficial to carry a backpack like this because it is worn on both shoulders	C	This position is correct because the head and cervical spine are correctly positioned	3. 36 - 45 years	2. Woman	Registrar	2. Married	4. Higher education	2. Employed	1. The village	2. Two	4. Good - the budget covers the expenses related to the maintenance of the family; enough to pay for additional activities for the child and summer and winter holidays for the family
2023-06-13 21:42:22	B	Scoliosis	I don't know	C	Scoliosis	Incorrect body posture or rounding of the back while working at the computer	A	Incorrect size of lumbar lordosis	Abdominal muscle weakness	C	Scoliosis	Long work at the computer in an asymmetrical sitting position	B	I don't know	I don't know	A	I don't know	I don't know	C	Flat foot	I don't know	B	I don't know	I don't know	B	I don't know	A	This position is correct because the lumbar spine (back) is straight and its position prevents so-called low back pain	B	This position is correct because the spine is correctly positioned, with properly preserved curves	C	This position is correct because the person walks straight, keeping his head in the correct position	B	This position is correct because the entire spine is erect and in the right position	C	This position is correct because the spine is in the right position	A	Such carrying a backpack is beneficial - the backpack straps are properly adjusted, the backpack adheres well to the back	C	This position is correct and does not cause posture disorders	3. 36 - 45 years	1. Man	The engineer	2. Married	4. Higher education	2. Employed	5. City with more than 200,000 inhabitants	1. One thing	3. Average - the budget is enough for basic expenses related to the maintenance of the family, as well as to pay for additional activities for the child
2023-06-14 09:18:12	B	Incorrect size of lumbar lordosis	Too long use of the mobile phone in the wrong position	C	Incorrect size of thoracic kyphosis	Incorrect body posture or rounding of the back while working at the computer	A	Incorrect size of lumbar lordosis	Walking in high-heeled shoes for a long time	C	Scoliosis	Long work at the computer in an asymmetrical sitting position	B	Knee stying	Osteoarthritis of the knee joint	A	Knee valgus	This abnormality is common in young children, mild cases are not a cause for concern	C	Flat foot	Over time, this problem contributes to the deformation of the ankle joint and causes pain	B	Toe valgus	Walking in shoes that are too small and too narrow	C	This position is correct, because_x0002_the knee joints are not in the non_x0002_toural setting	A	This position is correct because the person uses the knee joints and thigh muscles to prevent spinal overload	B	This position is correct because the spine is correctly positioned, with properly preserved curves	C	This position is correct because the person walks straight, keeping his head in the correct position	B	This position is correct because the head is positioned down more than 10 degrees	C	This position is correct because the spine is in the right position	A	Such carrying a backpack is beneficial - the backpack straps are properly adjusted, the backpack adheres well to the back	C	This position is correct because the head and cervical spine are correctly positioned	3. 36 - 45 years	1. Man	Architect	2. Married	4. Higher education	3. Own business	4. A city with a population of 50 to 200,000	2. Two	3. Average - the budget is enough for basic expenses related to the maintenance of the family, as well as to pay for additional activities for the child
2023-06-14 10:20:59	B	Excessive extension of the head and shoulders forward	Watching TV in the wrong position, Using the Internet, playing games on mobile devices with the head set in the wrong position, Too long use of the mobile phone in the wrong position	C	I don't know	Incorrect body posture or rounding of the back while working at the computer, Too long use of the mobile phone in the wrong position	A	I don't know	I don't know	C	I don't know	Long computer work in an asymmetrical sitting position, the habit of incorrect body posture in a sitting position during the day	B	I don't know	Knee osteoarthritis, I don't know	A	Knee valgus	I don't know	C	Flat foot	I don't know	B	Toe valgus	Walking in high-heeled shoes	C	This position is correct, because_x0002_the knee joints are not in the non_x0002_toural setting	A	This position is correct because the lumbar spine (back) is straight and its position prevents so-called low back pain, This position is correct because the person uses the knee joints and thigh muscles to prevent spinal overload	B	This position is correct because the spine is correctly positioned, with properly preserved curves	C	This position is correct because the person walks straight, keeping his head in the correct position	B	This position is correct because the head and neck are in the correct position and the person is not looking down, This position is correct because the entire spine is straight and in the right position	C	This position is correct because the spine is in the right position	A	Such carrying a backpack is beneficial because it is put on both arms, Such carrying a backpack is beneficial - the straps of the backpack are properly adjusted, the backpack fits well to the back	C	This position is correct because the head and cervical spine are positioned correctly, This position is correct because the position of the entire spine is properly positioned, This position is correct and does not cause disturbances in body posture	3. 36 - 45 years	1. Man	Sales manager	2. Married	4. Higher education	2. Employed	4. A city with a population of 50 to 200,000	2. Two	3. Average - the budget is enough for basic expenses related to the maintenance of the family, as well as to pay for additional activities for the child
2023-06-14 17:18:45	B	Excessive extension of the head and shoulders forward	Using the Internet, playing games on mobile devices with the head set in the wrong position	C	Incorrect size of thoracic kyphosis	Incorrect body posture or rounding of the back while working at the computer	A	Incorrect size of lumbar lordosis	Abdominal muscle weakness	C	Scoliosis	The habit of incorrect body posture in a sitting position during the day	B	Knee stying	Excessive supination of the foot/feet	A	Knee valgus	This abnormality is common in young children, mild cases are not a cause for concern	C	Flat foot	Stretching (and weakening) of the plantar tendon and internal muscles of the foot	B	Toe valgus	Walking in shoes that are too small and too narrow	C	This position is correct, because_x0002_the knee joints are not in the non_x0002_toural setting	A	This position is correct because the person uses the knee joints and thigh muscles to prevent spinal overload	B	This position is correct because the spine is correctly positioned, with properly preserved curves	C	This position is correct because the person walks straight, keeping his head in the correct position	B	This position is correct because the head and neck are in the correct position and the person is not looking down	C	This position is correct because the spine is in the right position	A	Such carrying a backpack is beneficial - the backpack straps are properly adjusted, the backpack adheres well to the back	C	This position is correct and does not cause posture disorders	3. 36 - 45 years	1. Man	The educator	2. Married	4. Higher education	2. Employed	4. A city with a population of 50 to 200,000	2. Two	4. Good - the budget covers the expenses related to the maintenance of the family; enough to pay for additional activities for the child and summer and winter holidays for the family
2023-06-15 21:23:16	B	Excessive extension of the head and shoulders forward	Watching TV in the wrong position, Using the Internet, playing games on mobile devices with the head set in the wrong position, Too long use of the mobile phone in the wrong position	C	Incorrect size of thoracic kyphosis	Incorrect body posture or rounding of the back while working at the computer, Too long use of the mobile phone in the wrong position	A	Incorrect size of lumbar lordosis	Abdominal muscle weakness	C	Scoliosis	Long computer work in an asymmetrical sitting position, the habit of incorrect body posture in a sitting position during the day	B	Knee stying	Degenerative disease of the knee joint, Excessive extension of the lateral ligaments a result of injury	A	Knee valgus	This abnormality is common in young children, mild cases are not a cause for concern, If this defect occurs in children under 10 years of age should consult a specialist as soon as possible, Such an arrangement of the knee joints does notAffects body posture	C	Flat foot	Over time, this problem contributes to the deformation of the ankle joint and causes pain, stretching (and weakness) of the plantar tendon and internal muscles of the foot	B	Toe valgus	Walking in high-heeled shoes, Walking in shoes that are too small and too narrow	C	This position is correct, because_x0002_the knee joints are not in the non_x0002_toural setting	A	This position is correct because the lumbar spine (back) is straight and its position prevents so-called low back pain, This position is correct because the person uses the knee joints and thigh muscles to prevent spinal overload	B	This position is correct because the spine is correctly positioned, with properly preserved curves	C	This position is correct because the person walks straight, keeping his head in the correct position	B	This position is correct because the head and neck are in the correct position and the person is not looking down, This position is correct because the entire spine is straight and in the right position	C	This position is correct because the spine is in the right position	A	Such carrying a backpack is beneficial because it is put on both arms, Such carrying a backpack is beneficial - the straps of the backpack are properly adjusted, the backpack fits well to the back	C	This position is correct because the head and cervical spine are positioned correctly, This position is correct because the position of the entire spine is properly positioned, This position is correct and does not cause disturbances in body posture	4. Over 45 years old	1. Man	Schoolteacher	2. Married	4. Higher education	2. Employed	1. The village	2. Two	4. Good - the budget covers the expenses related to the maintenance of the family; enough to pay for additional activities for the child and summer and winter holidays for the family
2023-06-15 22:41:18	B	Scoliosis	Watching TV in the wrong position, Too long use of the mobile phone in the wrong position	C	Incorrect size of lumbar lordosis	Incorrect body posture or rounding of the back while working at the computer, Too long use of the mobile phone in the wrong position	A	Incorrect size of lumbar lordosis	Abdominal muscle weakness	C	Incorrect size of thoracic kyphosis	Long computer work in an asymmetrical sitting position, the habit of incorrect body posture in a sitting position during the day	C	Knee stying	Osteoarthritis of the knee joint	A	Knee valgus	If this defect occurs in children under 10 years of age, consult a specialist as soon as possible	C	Flat foot	Stretching (and weakening) of the plantar tendon and internal muscles of the foot	B	Hollow foot	Walking in shoes that are too small and too narrow	C	This position is correct, because_x0002_the knee joints are not in the non_x0002_toural setting	A	This position is correct because the lumbar spine (back) is straight and its position prevents so-called low back pain, This position is correct because the person uses the knee joints and thigh muscles to prevent spinal overload	B	This position is correct because the spine is correctly positioned, with properly preserved curves	C	This position is correct because the person walks straight, keeping his head in the correct position	B	This position is correct because the head and neck are in the correct position and the person is not looking down	C	This position is correct because the spine is in the right position	A	It is beneficial to carry a backpack like this because it is worn on both shoulders	C	This position is correct because the head and cervical spine are correctly positioned	3. 36 - 45 years	2. Woman	Accountant	2. Married	3. High school/Technicum	2. Employed	5. City with more than 200,000 inhabitants	2. Two	3. Average - the budget is enough for basic expenses related to the maintenance of the family, as well as to pay for additional activities for the child
2023-06-16 10:16:50	B	Excessive extension of the head and shoulders forward	Watching TV in the wrong position, Using the Internet, playing games on mobile devices with the head set in the wrong position, Too long use of the mobile phone in the wrong position	C	Incorrect size of lumbar lordosis	Incorrect body posture or rounding of the back while working at the computer, Too long use of the mobile phone in the wrong position	A	Incorrect size of lumbar lordosis	Walking in high-heeled shoes for a long time	C	Scoliosis	Long computer work in an asymmetrical sitting position, the habit of incorrect body posture in a sitting position during the day	B	Knee valgus	Osteoarthritis of the knee joint, Excessive supination of the foot/foot	A	Knee stying	If this defect occurs in children under 10 years of age, consult a specialist as soon as possible	C	Flat foot	Over time, this problem contributes to the deformation of the ankle joint and causes pain	B	Toe valgus	Walking in shoes that are too small and too narrow	C	This position is correct, because_x0002_the knee joints are not in the non_x0002_toural setting	A	This position is correct because the lumbar spine (back) is straight and its position prevents so-called low back pain	B	This position is correct because the spine is correctly positioned, with properly preserved curves	C	This position is correct because the person walks straight, keeping his head in the correct position	A	This position is correct because the entire spine is erect and in the right position	C	This position is correct because the spine is in the right position	A	Such carrying a backpack is beneficial because it is put on both arms, Such carrying a backpack is beneficial - the straps of the backpack are properly adjusted, the backpack fits well to the back	C	This position is correct because the position of the entire spine is properly positioned, This position is correct and does not cause disturbances in body posture	3. 36 - 45 years	1. Man	Scientist	2. Married	4. Higher education	2. Employed	5. City with more than 200,000 inhabitants	2. Two	4. Good - the budget covers the expenses related to the maintenance of the family; enough to pay for additional activities for the child and summer and winter holidays for the family
2023-06-18 09:57:39	B	Scoliosis	Watching TV in the wrong position	C	Scoliosis	Incorrect body posture or rounding of the back while working at the computer	A	Incorrect size of lumbar lordosis	Abdominal muscle weakness	C	Scoliosis	Long work at the computer in an asymmetrical sitting position	B	I don't know	I don't know	A	Knee valgus	I don't know	C	Flat foot	I don't know	B	Toe valgus	I don't know	B	I don't know	A	This position is correct because the lumbar spine (back) is straight and its position prevents so-called low back pain	B	This position is correct because the spine is correctly positioned, with properly preserved curves	C	This position is correct because the person walks straight, keeping his head in the correct position	B	This position is correct because the entire spine is erect and in the right position	C	This position is correct because the spine is in the right position	A	Such carrying a backpack is beneficial - the backpack straps are properly adjusted, the backpack adheres well to the back	C	This position is correct because the position of the entire spine is properly positioned	3. 36 - 45 years	1. Man	The engineer	2. Married	4. Higher education	2. Employed	5. City with more than 200,000 inhabitants	1. One thing	4. Good - the budget covers the expenses related to the maintenance of the family; enough to pay for additional activities for the child and summer and winter holidays for the family
2023-06-19 09:12:43	B	Excessive extension of the head and shoulders forward	Using the Internet, playing games on mobile devices with the head set in the wrong position	C	Incorrect size of lumbar lordosis	Incorrect body posture or rounding of the back while working at the computer	A	Incorrect size of lumbar lordosis	Abdominal muscle weakness	C	Scoliosis	The habit of incorrect body posture in a sitting position during the day	B	Knee stying	Excessive supination of the foot/feet	A	Knee valgus	This abnormality is common in young children, mild cases are not a cause for concern	C	Flat foot	Stretching (and weakening) of the plantar tendon and internal muscles of the foot	B	Toe valgus	Walking in shoes that are too small and too narrow	A	This position is correct, because_x0002_the knee joints are not in the non_x0002_toural setting	A	This position is correct because the person uses the knee joints and thigh muscles to prevent spinal overload	B	This position is correct because the spine is correctly positioned, with properly preserved curves	C	This position is correct because the person walks straight, keeping his head in the correct position	B	This position is correct because the head and neck are in the correct position and the person is not looking down	C	This position is correct because the spine is in the right position	A	It is beneficial to carry a backpack like this because it is worn on both shoulders	C	This position is correct because the position of the entire spine is properly positioned	3. 36 - 45 years	1. Man	The educator	2. Married	4. Higher education	2. Employed	3. A city with a population of 10 to 50,000	2. Two	4. Good - the budget covers the expenses related to the maintenance of the family; enough to pay for additional activities for the child and summer and winter holidays for the family
2023-06-20 12:00:43	B	Scoliosis	Using the Internet, playing games on mobile devices with the head set in the wrong position	C	Scoliosis	Too long use of the mobile phone in the wrong position	A	I don't know	Abdominal muscle weakness	C	I don't know	Long work at the computer in an asymmetrical sitting position	B	I don't know	Osteoarthritis of the knee joint	A	I don't know	I don't know	C	Flat foot	Over time, this problem contributes to the deformation of the ankle joint and causes pain	B	Toe valgus	Walking in high-heeled shoes	C	This position is correct, because_x0002_the knee joints are not in the non_x0002_toural setting	A	This position is correct because the person uses the knee joints and thigh muscles to prevent spinal overload	B	This position is correct because the spine is correctly positioned, with properly preserved curves	C	This position is correct because the person walks straight, keeping his head in the correct position	B	This position is correct because the entire spine is erect and in the right position	C	This position is correct because the spine is in the right position	A	Such carrying a backpack is beneficial - the backpack straps are properly adjusted, the backpack adheres well to the back	B	This position is correct because the head and cervical spine are correctly positioned	3. 36 - 45 years	1. Man	Office worker	2. Married	4. Higher education	2. Employed	4. A city with a population of 50 to 200,000	2. Two	4. Good - the budget covers the expenses related to the maintenance of the family; enough to pay for additional activities for the child and summer and winter holidays for the family
[truncated: 11 more columns]
