# Supplementary material for: The test-retest reliability of a Body Posture Literacy Questionnaire among Polish teachers from different educational levels
Source: PeerJ journal article supplement (doi:10.7717/peerj.17952), 2024-09-23
Supplement: RawDataFigs.xlsx [file RawDataFigs.xlsx]

## Sheet: Liczba odpowiedzi 1
ID	Q1.1 Pre	Q1.1 Post	Q1.2 Pre	Q1.2 Post	Q1.3 Pre	Q1.3 Post	Q1.4 Pre	Q1.4 Post	Q2.1 Pre	Q2.1 Post	Q2.2 Pre	Q2.2 Post	Q2.3 Pre	Q2.3 Post	Q2.4 Pre	Q2.4 Post	Q3.1 Pre	Q3.1 Post	Q3.2 Pre	Q3.2 Post	Q3.3 Pre	Q3.3 Post	Q3.4 Pre	Q3.4 Post	Q4.1 Pre	Q4.1 Post	Q4.2 Pre	Q4.2 Post	Q4.3 Pre	Q4.3 Post	Q4.4 Pre	Q4.4 Post	Q5.1 Pre	Q5.1 Post	Q5.2 Pre	Q5.2 Post	Q5.3 Pre	Q5.3 Post	Q5.4 Pre	Q5.4 Post	Q6.1 Pre	Q6.1 Post	Q6.2 Pre	Q6.2 Post	Q6.3 Pre	Q6.3 Post	Q6.4 Pre	Q6.4 Post	Q7.1 Pre
1	2	2	2	2	4	4	4	4	3	3	2	2	1	1	2	2	1	1	2	2	1	1	1	1	3	3	3	3	2	2	3	3	2	2	1	1	2	2	3	3	1	1	2	2	1	1	3	3	3
2	2	2	2	2	4	4	4	4	3	3	2	2	1	1	2	2	1	1	2	2	1	1	1	1	3	3	3	3	2	2	3	3	2	2	1	1	2	2	3	3	1	1	2	2	1	1	3	3	3
3	2	2	2	2	4	4	4	4	3	3	2	2	1	1	2	2	1	1	2	2	1	1	1	1	3	3	3	3	2	2	3	3	2	2	1	1	2	2	3	3	1	1	2	2	4	4	4	3	3
4	2	2	2	2	4	4	3	2	3	3	3	2	1	1	3	3	1	1	2	2	4	1	1	1	3	3	3	3	2	2	2	2	2	2	1	1	4	1	3	4	1	1	2	2	4	1	4	4	3
5	2	2	2	2	4	4	2	2	3	3	2	2	4	4	2	2	1	1	2	2	1	1	1	1	3	3	3	3	1	1	2	2	2	2	1	1	4	4	3	3	1	1	2	2	1	1	4	4	3
6	2	2	1	1	1	1	2	2	3	3	1	1	3	3	3	3	1	1	3	3	3	3	2	2	3	3	4	4	2	2	4	4	3	3	1	1	3	3	3	3	1	1	2	2	1	1	4	4	3
7	2	2	2	2	1	4	4	2	3	3	2	2	4	1	3	1	1	1	2	2	1	1	4	3	3	3	4	4	2	2	2	2	2	2	1	1	1	1	3	3	1	1	2	2	1	1	3	3	3
8	2	2	2	2	4	4	3	3	3	3	1	1	1	1	4	4	1	1	2	2	1	1	4	4	3	3	3	3	2	2	2	2	3	3	3	3	4	4	3	3	1	2	3	3	4	4	3	3	3
9	2	2	2	2	4	4	2	2	3	2	2	2	1	1	1	2	1	1	2	2	1	4	1	1	3	3	3	3	2	2	2	2	2	2	1	1	3	4	4	4	1	1	2	2	4	1	4	4	3
10	2	2	2	2	4	3	4	2	3	3	2	2	1	1	2	4	1	1	2	2	3	3	1	1	3	3	3	3	2	2	4	4	2	2	1	1	3	2	2	3	1	1	2	2	1	1	3	3	3
11	2	2	2	2	4	4	2	2	3	3	2	2	1	1	3	2	1	1	2	2	1	4	1	1	3	3	3	3	2	2	2	2	2	2	1	1	2	4	3	4	1	1	2	2	4	1	4	4	3
12	2	2	2	2	4	4	4	2	3	3	2	2	4	4	2	4	1	1	2	2	1	1	1	1	3	3	3	3	2	2	4	4	2	2	1	1	4	4	3	3	1	1	2	2	1	1	3	4	3
13	2	2	2	2	4	4	3	3	3	3	1	2	1	1	4	4	1	1	2	2	1	1	1	1	3	3	3	3	2	2	3	2	2	2	1	1	3	4	3	3	1	1	2	2	1	4	3	4	3
14	2	2	2	2	4	4	4	4	3	3	2	2	1	1	2	2	1	1	2	2	1	1	1	1	3	3	3	3	2	2	2	2	2	2	1	3	4	2	3	3	1	1	2	3	1	4	3	3	3
15	2	2	2	2	4	4	4	4	3	3	2	2	1	1	1	1	1	1	2	2	5	1	5	1	3	3	2	2	5	5	2	2	2	2	1	1	5	2	3	3	1	1	5	2	5	1	5	3	3
16	2	2	2	2	4	4	3	3	3	3	2	2	1	1	4	2	1	1	2	2	1	1	1	1	3	3	3	3	2	2	4	4	2	2	1	1	3	2	3	3	1	1	2	3	4	4	4	4	3
17	2	2	2	2	4	4	4	4	3	3	2	2	1	1	2	2	1	1	2	2	1	1	2	2	3	3	3	3	2	2	4	4	2	2	1	1	4	4	3	3	1	1	2	2	1	1	3	3	3
18	2	2	2	2	4	4	4	4	3	3	1	2	1	4	2	2	1	1	5	2	5	1	5	3	3	3	3	3	2	2	4	4	3	3	3	3	4	4	1	3	1	1	2	2	4	4	1	4	3
19	2	2	2	2	3	3	3	3	3	3	2	2	1	1	1	2	1	1	2	2	1	1	3	1	3	3	3	3	2	2	2	2	3	3	2	1	1	1	1	3	1	1	2	2	1	1	4	4	3
20	2	2	2	2	4	4	4	4	3	3	2	2	3	1	2	2	1	1	2	2	1	1	1	1	3	3	3	3	2	2	2	2	2	2	1	1	2	2	3	3	1	1	2	2	4	4	3	3	3
21	2	2	2	2	4	4	4	4	3	3	2	2	1	1	2	2	1	1	2	2	1	1	1	1	3	3	3	3	2	2	2	2	2	2	1	1	4	4	3	3	1	1	2	2	1	1	3	3	1
22	2	2	2	2	4	4	4	4	3	3	2	2	1	1	2	2	1	1	2	2	1	1	1	1	3	3	3	3	2	2	2	2	2	2	1	1	2	2	3	3	1	1	2	2	4	4	4	4	3
23	2	2	2	2	4	4	1	4	3	3	2	2	4	4	2	2	1	1	2	2	1	1	1	1	3	3	3	3	2	2	4	4	2	2	3	3	4	4	1	3	1	1	1	2	4	4	2	2	3
24	2	2	2	2	4	4	4	4	3	3	2	2	1	1	2	2	1	1	2	2	1	1	1	1	3	3	3	3	2	2	2	2	2	2	3	1	4	4	5	5	1	1	3	2	4	4	3	3	3
25	2	2	2	2	4	4	3	3	3	3	2	2	1	1	2	2	1	1	2	2	1	1	1	1	3	3	3	3	2	2	2	2	2	2	1	1	4	4	3	3	1	1	2	2	4	4	4	4	3
26	2	2	2	2	4	4	4	4	3	3	2	2	1	1	5	2	1	1	2	2	1	1	5	1	3	3	3	3	2	2	2	2	2	2	1	1	4	4	3	3	1	1	2	2	4	4	4	4	3
27	2	2	2	2	4	4	4	4	3	3	2	2	1	1	4	2	1	1	2	2	1	1	1	1	3	3	3	3	2	2	2	2	2	2	1	1	5	2	5	3	1	1	2	2	4	4	4	4	3
28	2	2	2	2	4	4	3	3	3	3	2	2	1	1	2	2	1	1	2	2	1	1	1	1	3	3	3	3	2	2	2	2	2	2	1	1	4	4	3	3	1	1	2	2	4	4	4	4	3
29	2	2	2	2	4	4	2	4	3	3	2	2	1	1	2	2	1	1	2	2	1	1	1	1	3	3	3	3	2	2	2	2	2	2	3	1	3	4	2	2	1	1	1	2	1	1	1	3	2
30	2	2	2	2	4	4	4	4	3	3	2	2	1	1	1	1	1	1	2	2	1	1	1	1	3	3	3	3	2	2	2	2	2	2	1	1	4	4	3	3	1	1	2	2	4	4	3	3	3
31	2	2	2	2	4	4	4	4	3	3	2	2	1	1	2	2	1	1	2	2	1	1	1	1	3	3	3	3	2	2	2	2	2	2	1	1	1	1	3	3	1	1	2	2	3	4	4	4	3
32	2	2	2	2	3	4	3	3	3	3	2	2	1	1	2	2	1	1	2	2	1	1	1	1	3	3	3	3	2	2	5	4	2	2	1	1	1	1	1	1	1	1	2	2	4	4	4	4	3
33	2	2	1	2	4	4	4	4	3	3	2	2	1	1	2	2	1	1	2	2	1	1	1	1	3	3	3	3	2	2	4	4	2	2	1	1	1	1	3	3	1	1	2	2	1	1	3	3	3
34	2	2	3	3	4	4	2	4	3	3	2	2	1	1	3	2	1	1	2	2	1	1	1	1	3	3	3	3	2	2	4	4	2	2	1	1	4	4	2	3	1	1	2	2	4	4	3	3	3
35	2	2	2	2	4	4	2	2	3	3	2	2	1	1	1	1	1	1	2	2	1	1	2	2	3	3	3	3	2	2	2	2	3	3	3	3	2	2	1	1	1	1	3	2	1	1	1	1	3
36	2	2	2	2	4	4	4	4	3	3	2	2	1	1	1	1	1	1	2	2	1	1	2	2	3	3	3	3	1	1	4	4	1	1	1	1	2	2	1	1	1	1	2	2	4	4	4	4	1
37	2	2	2	2	4	4	5	5	3	3	2	2	1	1	5	5	1	1	2	2	1	1	5	5	3	3	3	3	2	2	5	4	3	3	1	1	4	4	5	5	1	1	2	2	1	1	4	4	1
38	2	2	2	2	4	4	2	2	3	3	4	2	4	4	3	3	1	1	2	2	1	1	1	1	3	3	3	3	2	2	4	4	2	2	3	3	4	4	4	4	1	1	2	2	3	4	4	4	3
39	2	2	2	2	4	4	4	4	3	3	2	2	1	1	4	4	1	1	2	2	1	1	1	1	3	3	3	3	1	1	2	2	2	2	1	1	2	2	3	3	1	1	2	2	1	1	4	4	3
40	2	2	2	2	4	4	4	4	3	3	2	2	4	4	1	1	1	1	2	2	1	1	1	1	3	3	3	3	2	2	2	2	2	2	1	1	2	2	3	3	1	1	2	2	4	4	4	4	3
41	2	2	2	2	1	4	2	2	3	3	1	2	3	3	3	3	1	1	3	2	1	1	3	3	3	3	3	3	2	2	3	3	2	2	1	1	2	2	2	2	1	1	2	2	2	2	4	4	3
42	2	2	2	2	4	4	4	4	3	3	1	1	3	3	2	2	1	1	2	2	1	1	1	1	3	3	3	3	2	2	4	4	2	2	1	1	2	2	2	2	1	1	2	2	4	4	2	4	3
43	2	2	2	2	4	4	3	4	3	3	2	2	1	1	4	2	1	1	2	2	1	1	1	1	3	3	3	3	2	2	2	2	2	2	1	1	4	4	3	3	1	1	2	2	4	4	4	4	3
44	2	2	2	2	4	4	4	4	3	3	2	2	1	1	2	2	1	1	2	2	1	1	2	1	3	3	3	3	2	2	4	3	2	2	1	1	2	2	3	3	1	1	2	2	4	4	3	3	3
45	2	2	2	2	4	4	3	4	3	3	2	2	1	1	2	2	1	1	2	2	1	1	1	1	3	3	3	3	2	2	4	3	2	2	1	1	4	2	2	3	1	1	2	2	4	4	3	3	3
46	2	2	2	2	4	4	3	4	3	3	2	2	1	1	2	2	1	1	2	2	1	1	1	1	3	3	3	3	2	2	4	4	2	2	1	1	3	2	4	4	1	1	2	2	4	4	3	3	3
47	2	2	2	2	4	4	4	4	3	3	2	2	1	1	2	2	1	1	2	2	1	1	1	1	3	3	3	3	2	2	2	4	2	2	1	1	4	4	3	3	1	1	2	2	4	4	3	3	3
48	2	2	2	2	4	4	2	2	3	3	2	2	1	1	2	2	1	1	2	2	1	1	1	1	3	3	3	3	2	2	2	2	2	2	1	1	2	3	4	3	1	1	2	2	4	4	3	3	3
49	2	2	2	2	4	4	2	2	3	3	2	2	1	1	2	2	1	1	2	2	1	1	1	1	3	3	3	3	2	2	4	4	2	2	1	1	3	2	3	3	1	1	2	2	4	4	3	3	3
50	2	2	2	2	4	4	4	4	3	3	2	2	1	1	2	2	1	1	2	2	4	1	1	1	3	3	3	3	2	2	2	2	2	2	1	1	4	4	3	3	1	1	2	2	4	4	3	3	3
51	2	2	2	2	4	4	4	4	3	3	2	2	1	1	2	2	1	1	2	2	1	1	2	1	3	3	3	3	2	2	2	2	2	2	1	1	3	3	3	3	1	1	2	2	4	4	3	3	3
52	2	2	2	2	4	4	4	4	3	3	2	2	4	1	2	2	1	1	2	2	1	1	2	2	3	3	3	3	2	2	2	2	2	2	1	1	2	2	3	3	1	1	2	2	4	4	3	3	3
53	2	2	2	2	4	4	3	4	3	3	2	2	1	1	2	2	1	1	2	2	1	1	1	1	3	3	3	3	2	2	2	2	2	2	1	1	2	2	3	3	1	1	2	2	4	4	3	3	3
54	2	2	2	2	4	4	3	4	3	3	2	2	1	1	2	2	1	1	2	2	1	1	1	1	3	3	3	3	2	2	2	2	2	2	1	1	4	4	3	3	1	1	2	2	4	4	3	3	3
55	2	2	2	2	4	4	3	3	3	3	2	2	1	1	2	2	1	1	2	2	1	1	1	1	3	3	3	3	2	2	2	2	2	2	1	1	4	4	3	3	1	1	2	2	4	4	3	3	3
56	2	2	2	2	4	4	4	4	3	3	2	2	1	1	2	2	1	1	2	2	1	1	1	1	3	3	3	3	2	2	2	2	2	2	1	1	2	2	3	3	1	1	2	2	4	4	3	3	3
57	2	2	2	2	4	4	4	4	3	3	2	2	1	1	2	2	1	1	2	2	4	4	1	1	3	3	3	3	2	2	2	2	2	2	1	1	4	4	3	3	1	1	2	2	4	4	3	3	3
58	2	2	2	2	4	4	4	4	3	3	2	2	1	1	2	2	1	1	2	2	1	1	1	1	3	3	3	3	2	2	2	2	2	2	1	1	2	4	3	3	1	1	2	2	4	4	4	3	3
59	2	2	2	2	4	4	4	4	3	3	2	2	1	1	2	2	1	1	2	2	1	1	1	1	3	3	3	3	2	2	2	2	2	2	1	1	2	4	3	3	1	1	2	2	4	4	3	3	3
60	2	2	2	2	4	4	3	3	3	3	2	2	1	1	1	2	1	1	2	2	1	1	1	1	3	3	3	3	2	2	2	2	2	2	1	1	4	4	3	3	1	1	2	2	4	4	5	4	3
61	2	2	2	2	4	4	4	4	3	3	2	2	1	1	2	2	1	1	2	2	1	1	1	1	3	3	3	3	2	2	4	2	2	2	1	1	2	2	3	3	1	1	2	2	4	4	3	3	3
62	2	2	2	2	4	4	4	4	3	3	2	2	1	1	2	2	1	1	2	2	1	1	1	1	3	3	3	3	2	2	2	2	2	2	1	1	4	4	3	3	1	1	2	2	1	4	3	3	3
63	2	2	2	2	4	4	4	4	3	3	2	2	1	1	2	2	1	1	2	2	1	1	1	1	3	3	3	3	2	2	2	2	2	2	1	1	4	4	3	3	1	1	2	2	1	1	4	4	3
64	2	2	2	2	4	4	4	4	3	3	2	2	1	1	2	2	1	1	2	2	1	1	1	1	3	3	3	3	2	2	2	2	2	2	1	1	4	4	3	3	1	1	2	2	1	1	4	3	3
65	2	2	2	2	4	4	4	4	3	3	2	2	1	1	2	2	1	1	2	2	1	1	1	1	3	3	3	3	2	2	2	2	2	2	1	1	2	4	3	3	1	1	2	2	4	4	3	3	3
66	2	2	2	2	4	4	4	4	3	3	2	2	1	1	2	2	1	1	2	2	1	1	1	1	3	3	3	3	2	2	2	2	2	2	1	1	4	4	3	3	1	1	2	2	4	4	3	3	3
67	2	2	2	2	4	4	4	4	3	3	2	2	1	1	2	2	1	1	2	2	1	1	1	1	3	3	3	3	2	2	2	2	2	2	1	1	4	4	3	3	1	1	2	2	4	4	3	3	3
68	2	2	2	2	4	4	4	4	3	3	2	2	1	1	2	2	1	1	2	2	1	1	1	1	3	3	3	3	2	2	2	2	2	2	1	1	4	4	3	3	1	1	2	2	4	4	3	3	3
69	2	2	2	2	4	4	3	4	3	3	2	2	1	1	2	2	1	1	2	2	1	1	1	1	3	3	3	3	2	2	2	2	2	2	1	1	4	4	3	3	1	1	2	2	4	4	4	3	3
70	2	2	2	2	4	4	4	4	3	3	2	2	1	1	2	2	1	1	2	2	1	1	1	1	3	3	3	3	2	2	2	2	2	2	1	1	4	4	3	3	1	1	2	2	4	4	4	4	3
71	2	2	2	2	4	4	4	4	3	3	2	2	1	1	2	2	1	1	2	2	1	1	1	1	3	3	3	3	2	2	2	2	2	2	1	1	2	4	4	3	1	1	2	2	1	4	4	4	3
72	2	2	2	2	4	4	3	3	3	3	2	2	1	1	2	2	1	1	2	2	1	1	1	1	3	3	3	3	2	2	2	2	2	2	1	1	2	4	3	3	1	1	2	2	4	4	1	4	3
73	2	2	2	2	4	4	3	3	3	3	2	2	3	1	2	2	1	1	2	2	1	1	1	1	3	3	3	3	2	2	4	2	2	2	1	1	4	4	3	3	1	1	2	2	4	4	4	4	3
74	2	2	2	2	4	4	4	4	3	3	2	2	1	1	2	2	1	1	2	2	1	1	1	1	3	3	3	3	2	2	2	2	2	2	3	1	4	4	3	3	1	1	3	2	4	4	1	1	3
75	2	2	2	2	4	4	4	4	3	3	2	2	1	1	2	2	1	1	2	2	1	1	1	1	3	3	3	3	2	2	2	2	2	2	1	1	4	4	3	3	1	1	2	2	4	4	3	3	3
76	2	2	2	2	4	4	2	4	3	3	2	2	1	1	2	2	1	1	2	2	1	1	1	1	3	3	3	3	2	2	2	2	2	2	1	1	4	4	4	4	1	1	2	2	4	4	4	4	3
77	1	2	2	2	4	4	3	3	3	3	2	2	1	1	2	2	1	1	2	2	1	1	1	1	3	3	3	3	2	2	2	2	2	2	1	1	4	4	3	3	1	1	2	2	4	4	1	4	3
78	2	2	2	2	4	4	4	4	3	3	1	2	1	1	3	2	1	1	2	2	1	1	1	1	3	3	3	3	2	2	2	2	2	2	1	1	1	1	4	3	1	1	2	2	4	4	4	4	3
79	2	2	2	2	4	4	1	3	3	3	2	2	1	1	2	2	1	1	2	2	4	1	1	1	3	3	3	3	2	2	2	2	2	2	1	1	5	2	3	3	1	1	2	2	4	4	4	4	3
80	2	2	2	2	4	4	2	4	3	3	2	2	1	1	4	4	1	1	5	2	1	1	1	1	3	3	3	3	2	2	2	2	2	2	1	1	4	4	4	3	1	1	2	2	4	4	4	4	3
81	2	2	1	1	4	4	4	4	3	3	1	1	1	1	2	2	1	1	2	2	1	1	1	1	3	3	3	3	2	2	2	2	2	2	3	3	1	1	3	3	1	1	1	1	4	4	4	4	3
82	2	2	2	2	4	4	4	4	3	3	2	2	1	1	2	2	1	1	2	2	1	1	4	4	3	3	3	3	2	2	2	2	2	2	1	1	1	4	3	3	1	1	2	2	4	4	4	4	3
83	2	2	2	2	4	4	2	2	3	3	1	2	4	4	1	1	1	1	2	2	1	1	1	1	3	3	3	3	2	2	2	2	2	2	1	1	1	1	4	4	1	1	2	2	4	4	4	4	3
84	2	2	2	2	4	4	2	2	3	3	1	1	4	4	2	2	1	1	2	2	1	1	1	1	3	3	3	3	2	2	2	2	2	2	1	1	1	1	4	4	1	1	2	2	4	4	4	4	3
85	2	2	2	2	4	4	2	2	3	3	1	1	4	4	2	2	1	1	2	2	1	1	1	1	3	3	3	3	2	2	2	2	2	2	1	1	1	1	4	4	1	1	2	2	4	4	4	4	3
86	2	2	2	2	4	4	2	2	3	3	2	2	1	4	2	2	1	1	2	2	1	1	1	1	3	3	3	3	2	2	2	2	2	2	1	1	1	1	4	4	1	1	2	2	4	4	3	4	3
87	2	2	2	2	4	4	2	2	3	3	2	2	1	4	2	2	1	1	2	2	1	1	1	1	3	3	3	3	2	2	2	2	2	2	1	1	4	1	4	4	1	1	2	2	1	4	3	4	3
88	2	2	1	2	4	4	2	2	3	3	2	2	1	1	2	2	1	1	2	2	1	1	3	1	3	3	3	3	2	2	2	2	2	2	1	1	1	1	4	4	1	1	2	2	4	4	4	4	3
89	2	2	2	2	4	4	2	4	3	3	2	2	1	1	1	2	1	1	2	2	4	1	1	1	3	3	3	3	2	2	2	2	2	2	1	1	1	1	4	4	1	1	2	2	4	4	4	4	3
90	2	2	2	2	4	4	3	4	3	3	2	2	1	1	4	2	1	1	4	2	4	4	3	1	3	3	3	3	2	2	2	2	2	2	1	1	2	1	2	4	1	1	2	2	1	1	3	3	3
91	2	2	2	2	4	4	4	4	3	3	2	2	1	1	1	4	1	1	2	2	4	4	3	4	3	3	3	3	2	2	2	2	2	2	1	1	1	1	4	4	1	1	2	2	4	1	4	4	3
92	2	2	2	2	4	4	4	4	3	3	2	2	4	1	2	2	1	1	2	2	1	1	1	4	3	3	3	3	2	2	2	2	2	2	1	1	4	4	2	2	1	1	2	2	4	4	4	4	3
93	2	2	2	2	4	4	4	4	3	3	2	2	1	1	2	2	1	1	2	2	1	1	1	1	3	3	3	3	2	2	3	3	2	2	1	1	2	2	3	3	1	1	2	2	1	1	3	3	3
94	2	2	2	2	4	4	4	4	3	3	2	2	1	1	2	2	1	1	2	2	1	1	1	1	3	3	3	3	2	2	3	3	2	2	1	1	2	2	3	3	1	1	2	2	1	1	3	3	3
95	2	2	2	2	4	4	4	4	3	3	2	2	1	1	2	2	1	1	2	2	1	1	1	1	3	3	3	3	2	2	3	3	2	2	1	1	2	2	3	3	1	1	2	2	4	4	4	3	3
96	2	2	2	2	4	4	3	2	3	3	3	2	1	1	3	3	1	1	2	2	4	1	1	1	3	3	3	3	2	2	2	2	2	2	1	1	4	1	3	4	1	1	2	2	4	1	4	4	3
97	2	2	2	2	4	4	2	2	3	3	2	2	4	4	2	2	1	1	2	2	1	1	1	1	3	3	3	3	1	1	2	2	2	2	1	1	4	4	3	3	1	1	2	2	1	1	4	4	3
98	2	2	1	1	1	1	2	2	3	3	1	1	3	3	3	3	1	1	3	3	3	3	2	2	3	3	4	4	2	2	4	4	3	3	1	1	3	3	3	3	1	1	2	2	1	1	4	4	3
99	2	2	2	2	1	4	4	2	3	3	2	2	4	1	3	1	1	1	2	2	1	1	4	3	3	3	4	4	2	2	2	2	2	2	1	1	1	1	3	3	1	1	2	2	1	1	3	3	3
100	2	2	2	2	4	4	3	3	3	3	1	1	1	1	4	4	1	1	2	2	1	1	4	4	3	3	3	3	2	2	2	2	3	3	3	3	4	4	3	3	1	2	3	3	4	4	3	3	3
101	2	2	2	2	4	4	2	2	3	2	2	2	1	1	1	2	1	1	2	2	1	4	1	1	3	3	3	3	2	2	2	2	2	2	1	1	3	4	4	4	1	1	2	2	4	1	4	4	3
102	2	2	2	2	4	3	4	2	3	3	2	2	1	1	2	4	1	1	2	2	3	3	1	1	3	3	3	3	2	2	4	4	2	2	1	1	3	2	2	3	1	1	2	2	1	1	3	3	3
103	2	2	2	2	4	4	2	2	3	3	2	2	1	1	3	2	1	1	2	2	1	4	1	1	3	3	3	3	2	2	2	2	2	2	1	1	2	4	3	4	1	1	2	2	4	1	4	4	3
104	2	2	2	2	4	4	4	2	3	3	2	2	4	4	2	4	1	1	2	2	1	1	1	1	3	3	3	3	2	2	4	4	2	2	1	1	4	4	3	3	1	1	2	2	1	1	3	4	3
105	2	2	2	2	4	4	3	3	3	3	1	2	1	1	4	4	1	1	2	2	1	1	1	1	3	3	3	3	2	2	3	2	2	2	1	1	3	4	3	3	1	1	2	2	1	4	3	4	3
106	2	2	2	2	4	4	4	4	3	3	2	2	1	1	2	2	1	1	2	2	1	1	1	1	3	3	3	3	2	2	2	2	2	2	1	3	4	2	3	3	1	1	2	3	1	4	3	3	3
107	2	2	2	2	4	4	4	4	3	3	2	2	1	1	1	1	1	1	2	2	5	1	5	1	3	3	2	2	5	5	2	2	2	2	1	1	5	2	3	3	1	1	5	2	5	1	5	3	3
108	2	2	2	2	4	4	3	3	3	3	2	2	1	1	4	2	1	1	2	2	1	1	1	1	3	3	3	3	2	2	4	4	2	2	1	1	3	2	3	3	1	1	2	3	4	4	4	4	3
109	2	2	2	2	4	4	4	4	3	3	2	2	1	1	2	2	1	1	2	2	1	1	2	2	3	3	3	3	2	2	4	4	2	2	1	1	4	4	3	3	1	1	2	2	1	1	3	3	3
110	2	2	2	2	4	4	4	4	3	3	1	2	1	4	2	2	1	1	5	2	5	1	5	3	3	3	3	3	2	2	4	4	3	3	3	3	4	4	1	3	1	1	2	2	4	4	1	4	3
111	2	2	2	2	3	3	3	3	3	3	2	2	1	1	1	2	1	1	2	2	1	1	3	1	3	3	3	3	2	2	2	2	3	3	2	1	1	1	1	3	1	1	2	2	1	1	4	4	3
112	2	2	2	2	4	4	4	4	3	3	2	2	3	1	2	2	1	1	2	2	1	1	1	1	3	3	3	3	2	2	2	2	2	2	1	1	2	2	3	3	1	1	2	2	4	4	3	3	3
113	2	2	2	2	4	4	4	4	3	3	2	2	1	1	2	2	1	1	2	2	1	1	1	1	3	3	3	3	2	2	2	2	2	2	1	1	4	4	3	3	1	1	2	2	1	1	3	3	1
114	2	2	2	2	4	4	4	4	3	3	2	2	1	1	2	2	1	1	2	2	1	1	1	1	3	3	3	3	2	2	2	2	2	2	1	1	2	2	3	3	1	1	2	2	4	4	4	4	3
115	2	2	2	2	4	4	1	4	3	3	2	2	4	4	2	2	1	1	2	2	1	1	1	1	3	3	3	3	2	2	4	4	2	2	3	3	4	4	1	3	1	1	1	2	4	4	2	2	3
116	2	2	2	2	4	4	4	4	3	3	2	2	1	1	2	2	1	1	2	2	1	1	1	1	3	3	3	3	2	2	2	2	2	2	3	1	4	4	5	5	1	1	3	2	4	4	3	3	3
117	2	2	2	2	4	4	3	3	3	3	2	2	1	1	2	2	1	1	2	2	1	1	1	1	3	3	3	3	2	2	2	2	2	2	1	1	4	4	3	3	1	1	2	2	4	4	4	4	3
118	2	2	2	2	4	4	4	4	3	3	2	2	1	1	5	2	1	1	2	2	1	1	5	1	3	3	3	3	2	2	2	2	2	2	1	1	4	4	3	3	1	1	2	2	4	4	4	4	3
[truncated: 49 more columns]
